# Supplementary material for: Safety of Topical Non-steroidal Anti-Inflammatory Drugs in Osteoarthritis: Outcomes of a Systematic Review and Meta-Analysis
Source: PubMed Central journal article supplement — Drugs Aging. 2019 May 9;36(Suppl 1):45–64. doi: 10.1007/s40266-019-00661-0 (PMC6509095; doi:10.1007/s40266-019-00661-0), 2019-05-09

**Drugs and Aging, 2019**

**Supplement: Safety of Anti-Osteoarthritis Medications**

**Safety of topical non-steroidal anti-inflammatory drugs in osteoarthritis: Outcomes of a systematic review and meta-analysis**

Germain Honvo, Victoria Leclercq, Anton Geerinck, Thierry Thomas, Nicola Veronese, Alexia Charles, Véronique Rabenda, Charlotte Beaudart, Cyrus Cooper, Jean-Yves Reginster, Olivier Bruyère

**ELECTRONIC SUPPLEMENTARY MATERIAL 2**

## A) All topical NSAIDs

**Figure 7:** Forest plot displaying the result of the meta-analysis comparing skin and subcutaneous tissue disorders with all topical nonsteroidal anti-inflammatory drugs (NSAIDs) versus placebo in patients with osteoarthritis (OA).

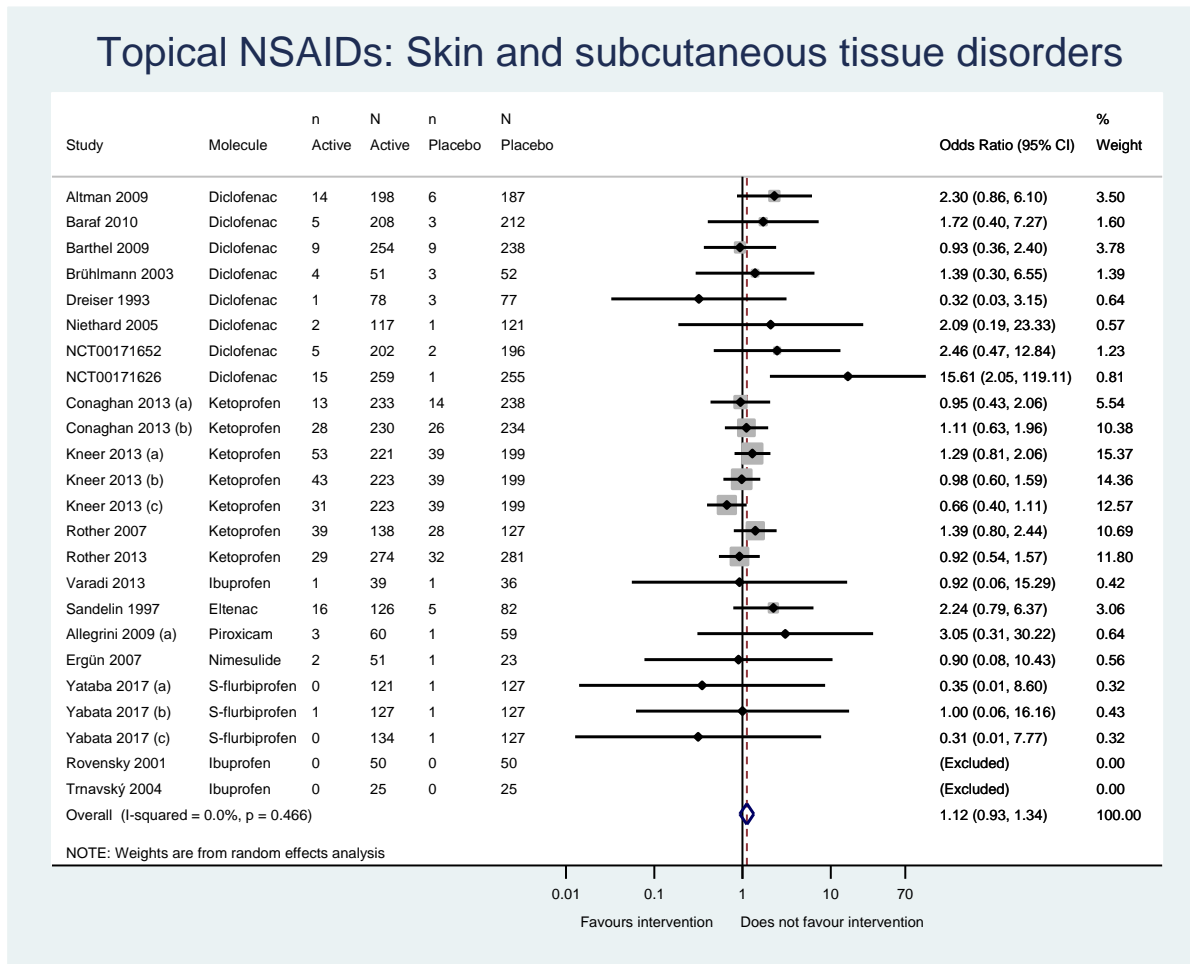

**Figure 8:** Forest plot displaying the result of the meta-analysis comparing cardiac disorders with all topical nonsteroidal anti-inflammatory drugs versus placebo in patients with OA.

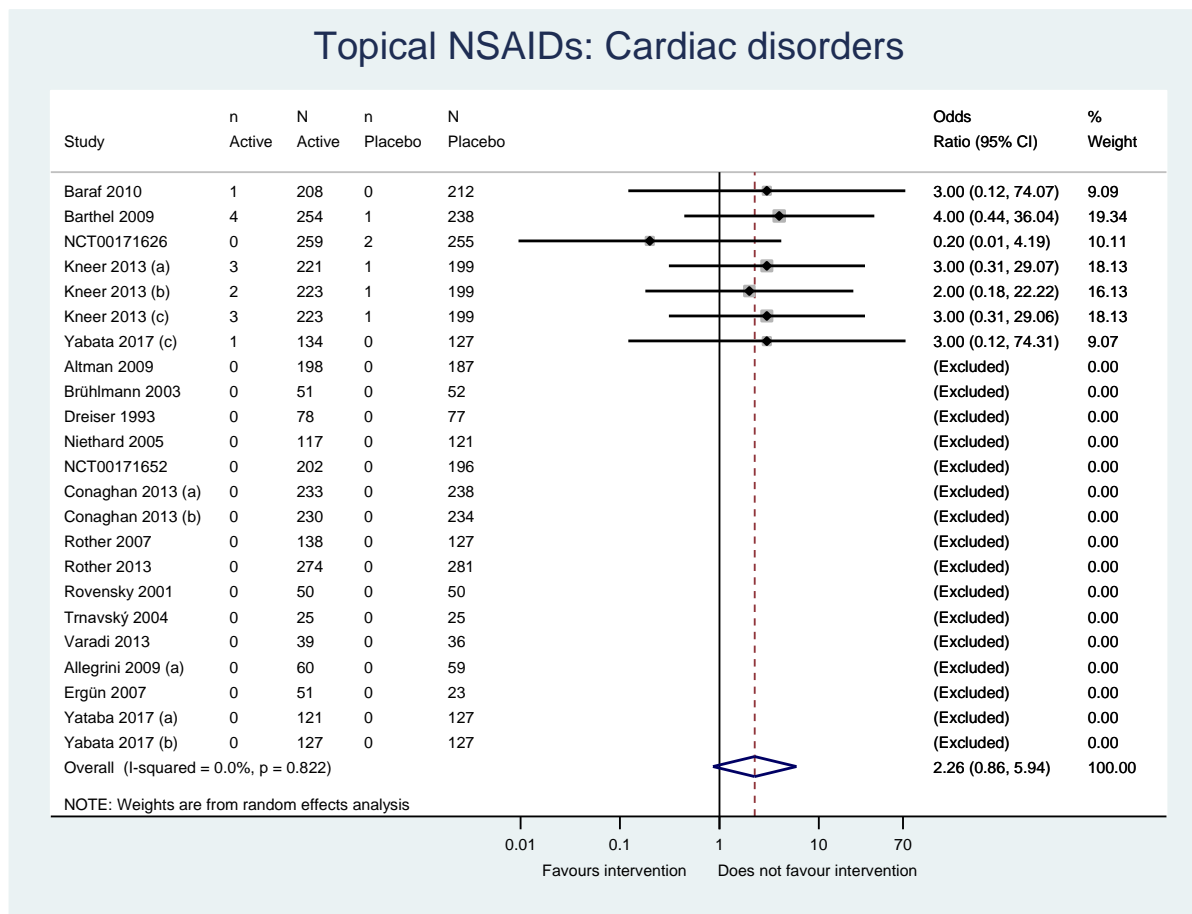

**Figure 9:** Forest plot displaying the result of the meta-analysis comparing vascular disorders with all topical nonsteroidal anti-inflammatory drugs versus placebo in patients with OA.

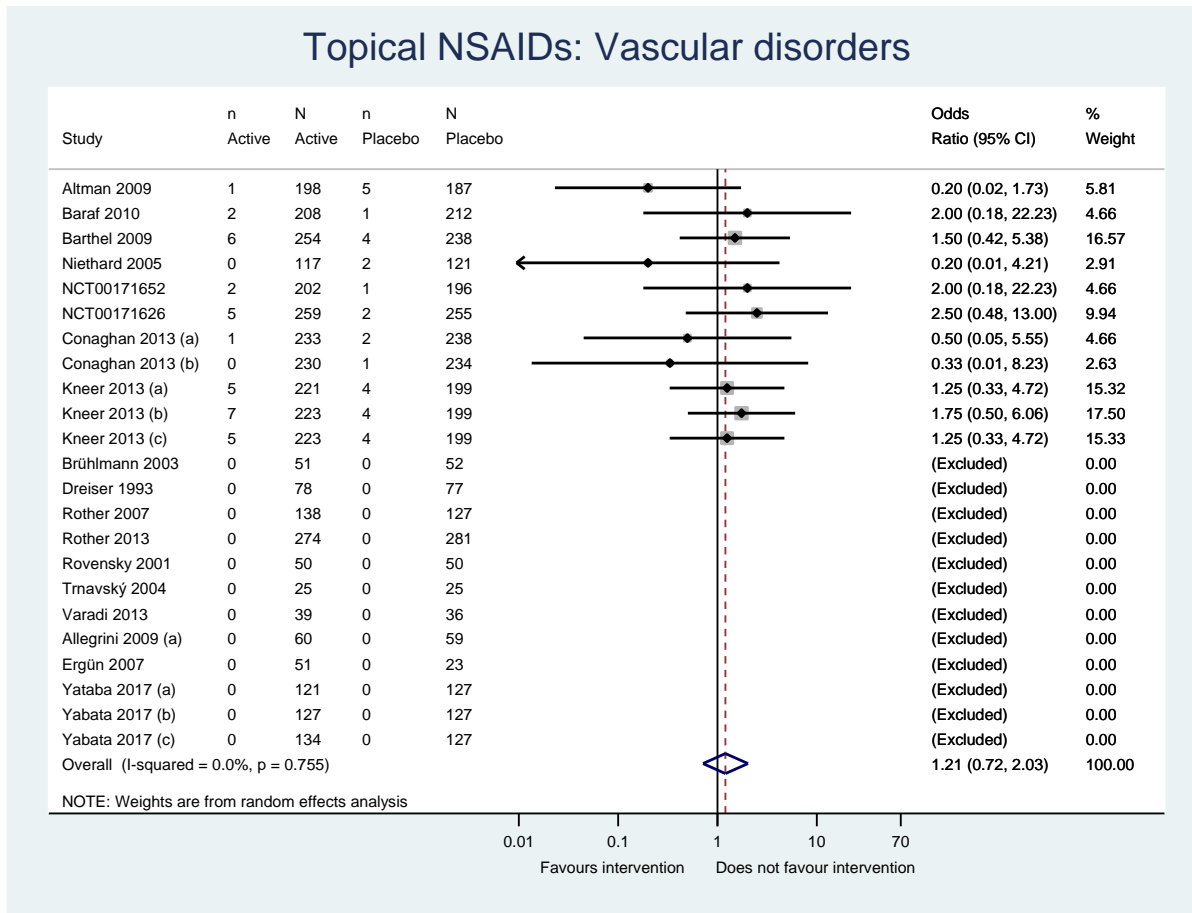

**Figure 10:** Forest plot displaying the result of the meta-analysis comparing nervous system disorders with all topical nonsteroidal anti-inflammatory drugs versus placebo in patients with OA.

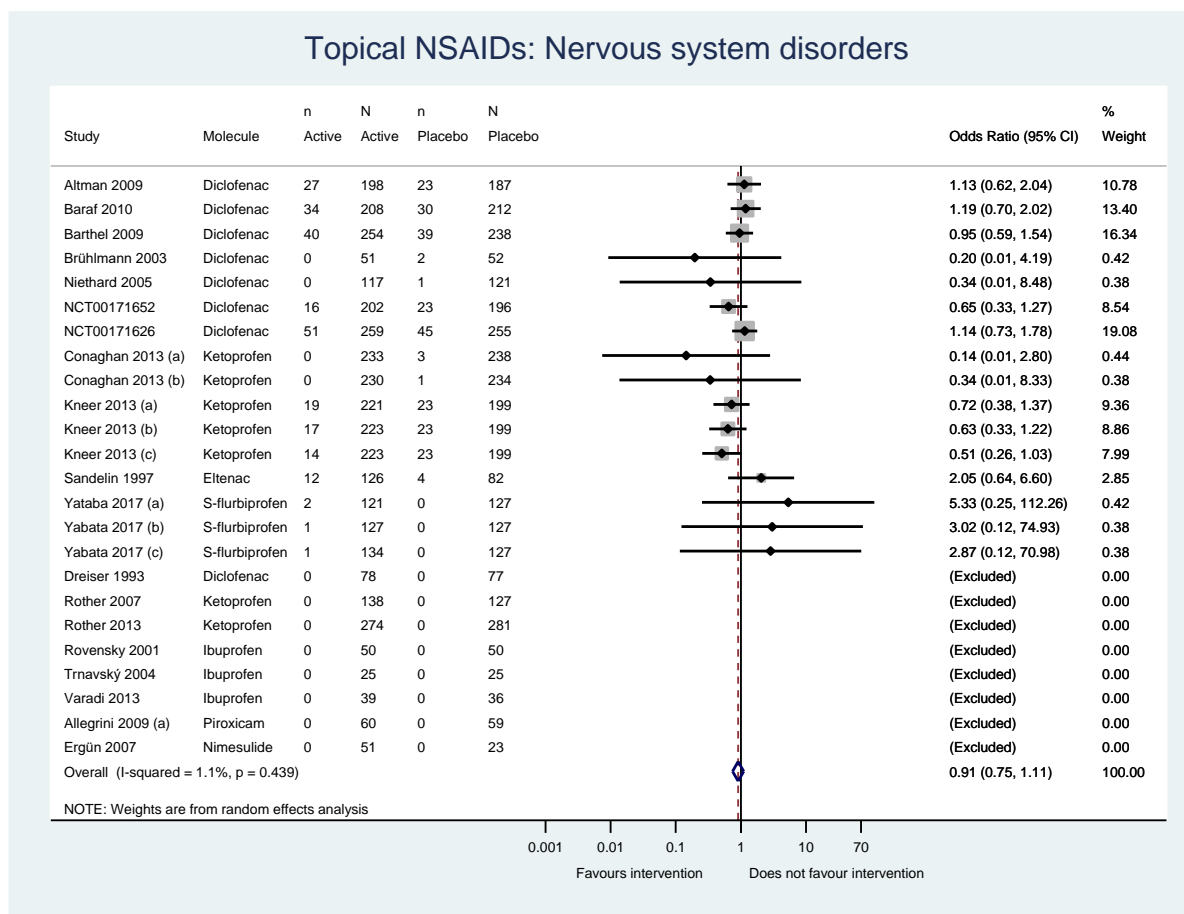

**Figure 11:** Forest plot displaying the result of the meta-analysis comparing musculoskeletal and connective tissue disorders with all topical nonsteroidal anti-inflammatory drugs versus placebo in patients with OA.

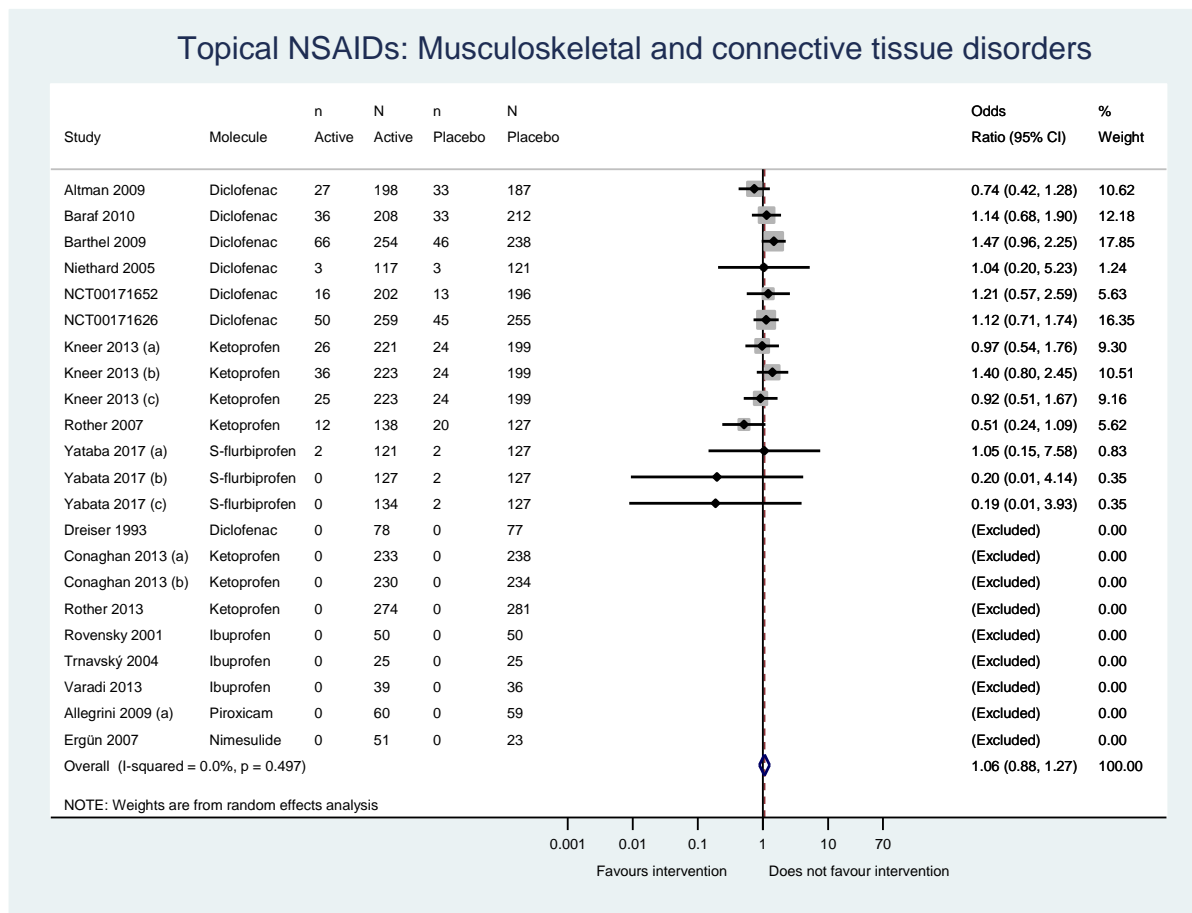

**Figure 12:** Forest plot displaying the result of the meta-analysis comparing severe adverse events with all topical nonsteroidal anti-inflammatory drugs versus placebo in patients with OA.

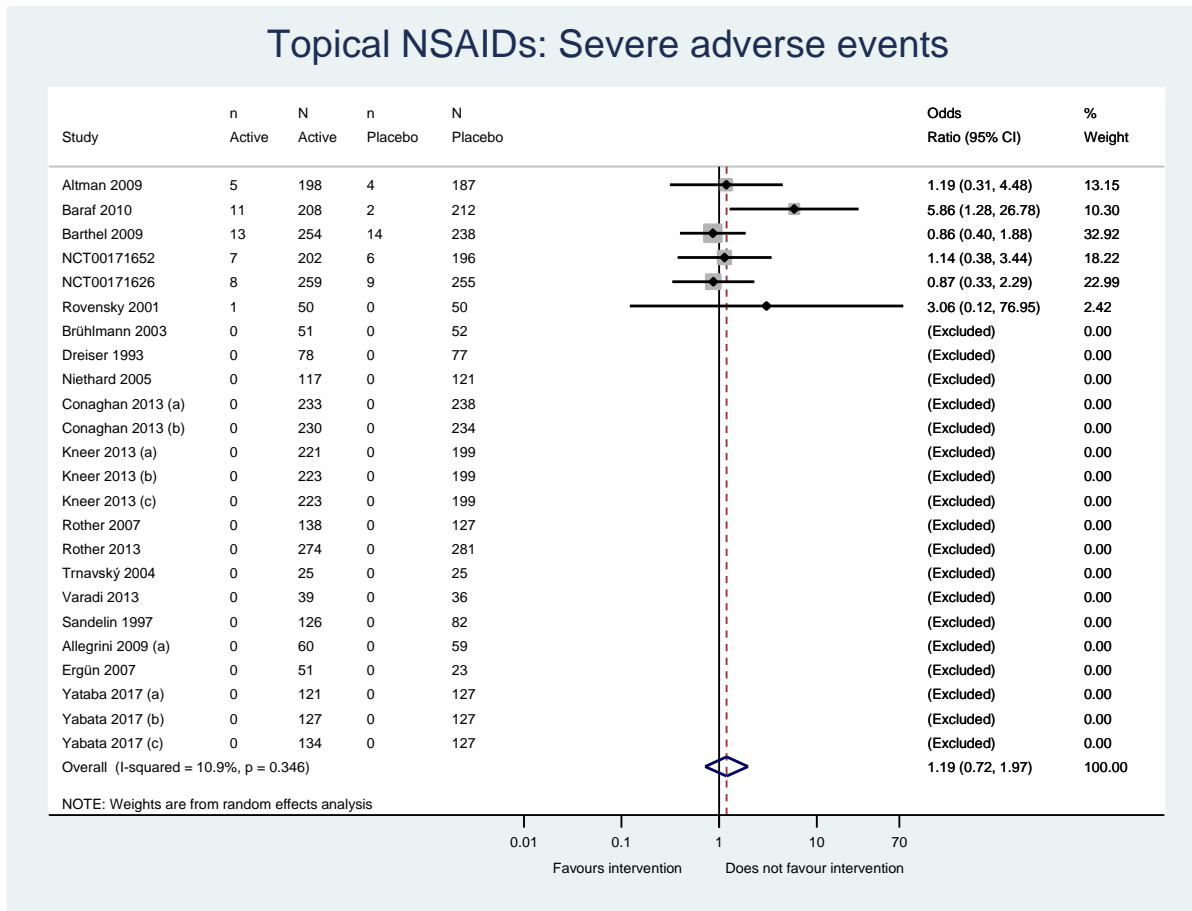

**Figure 13:** Forest plot displaying the result of the meta-analysis comparing serious adverse events with all topical nonsteroidal anti-inflammatory drugs versus placebo in patients with OA.

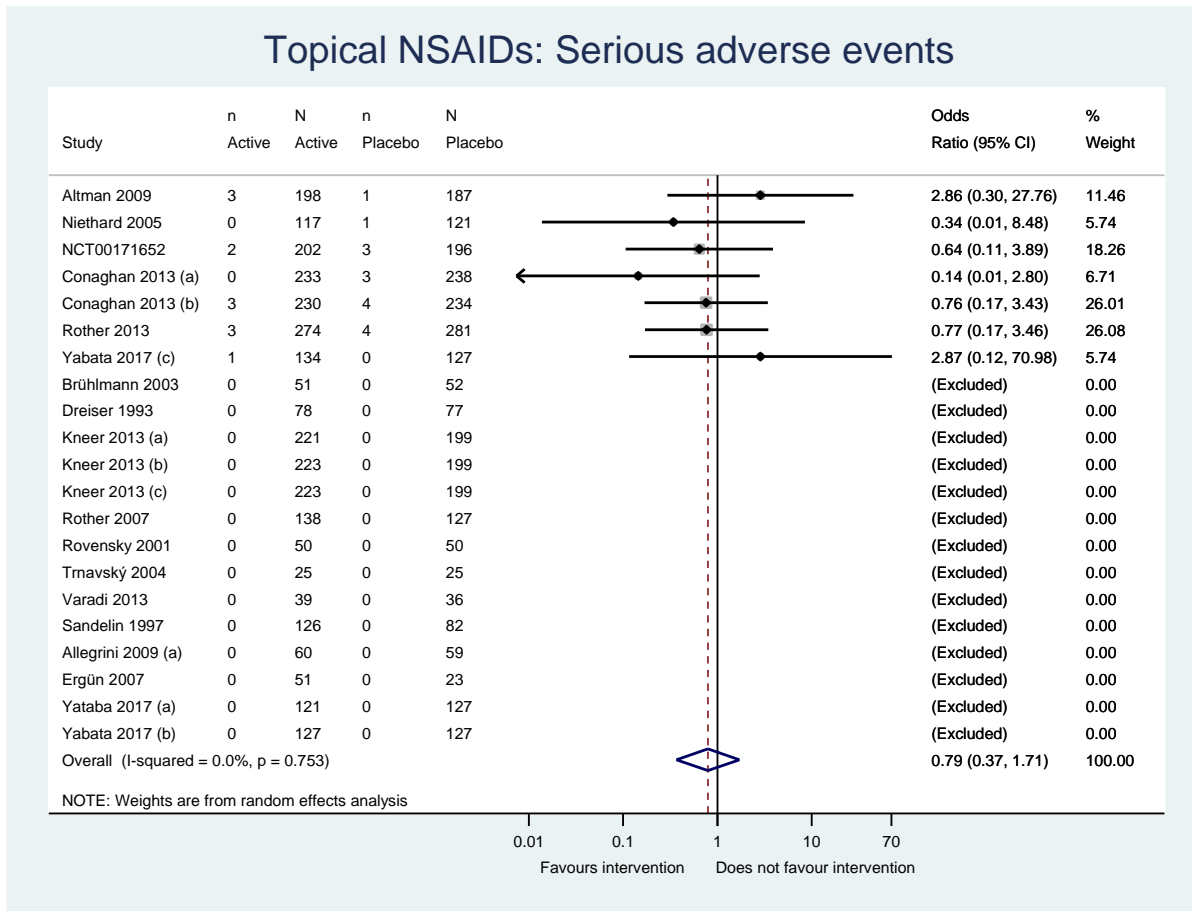



**Figure 14:** Forest plot displaying the result of the meta-analysis comparing dropouts due to adverse events with all topical nonsteroidal anti-inflammatory drugs versus placebo in patients with OA.

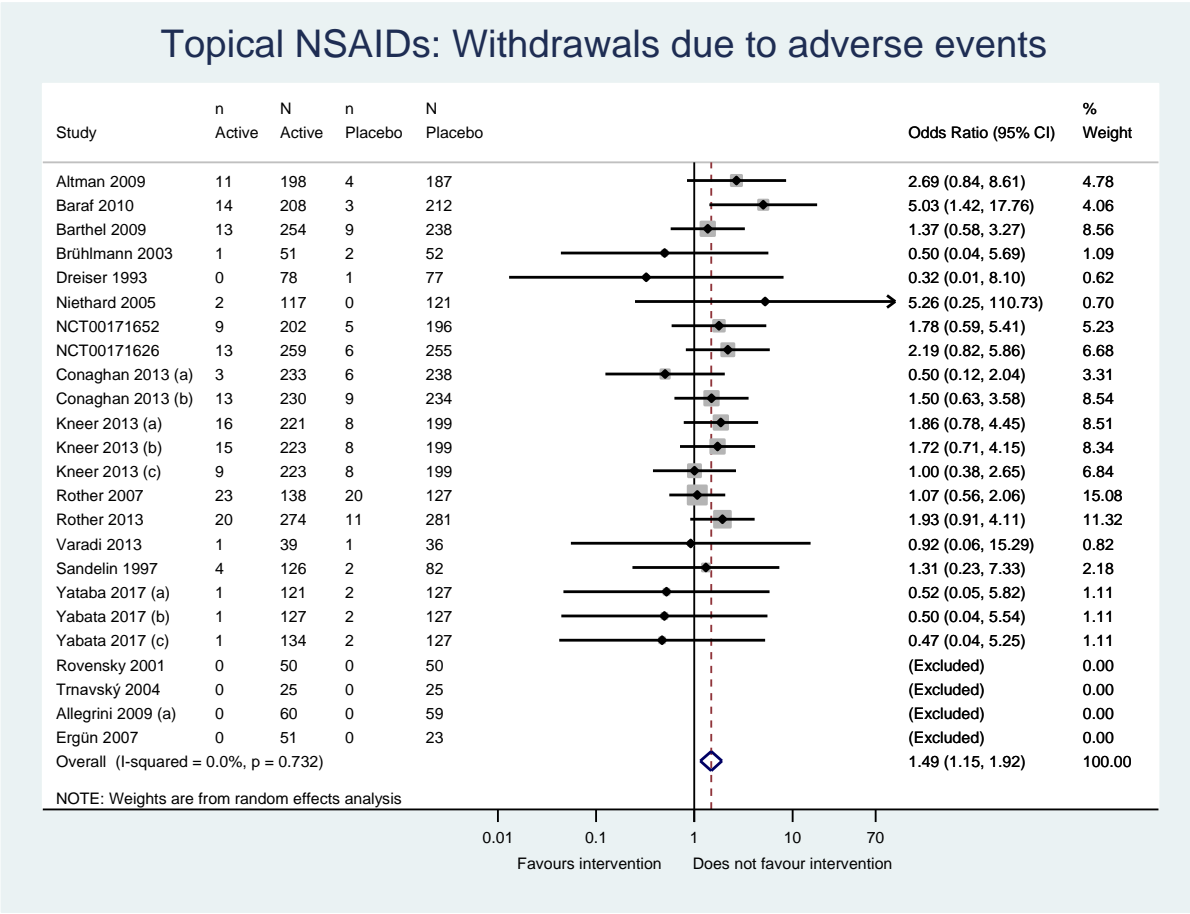

**Figure 15:** Forest plot displaying the result of the meta-analysis comparing total adverse events (AEs) (any AEs) with all topical nonsteroidal anti-inflammatory drugs versus placebo in patients with OA.

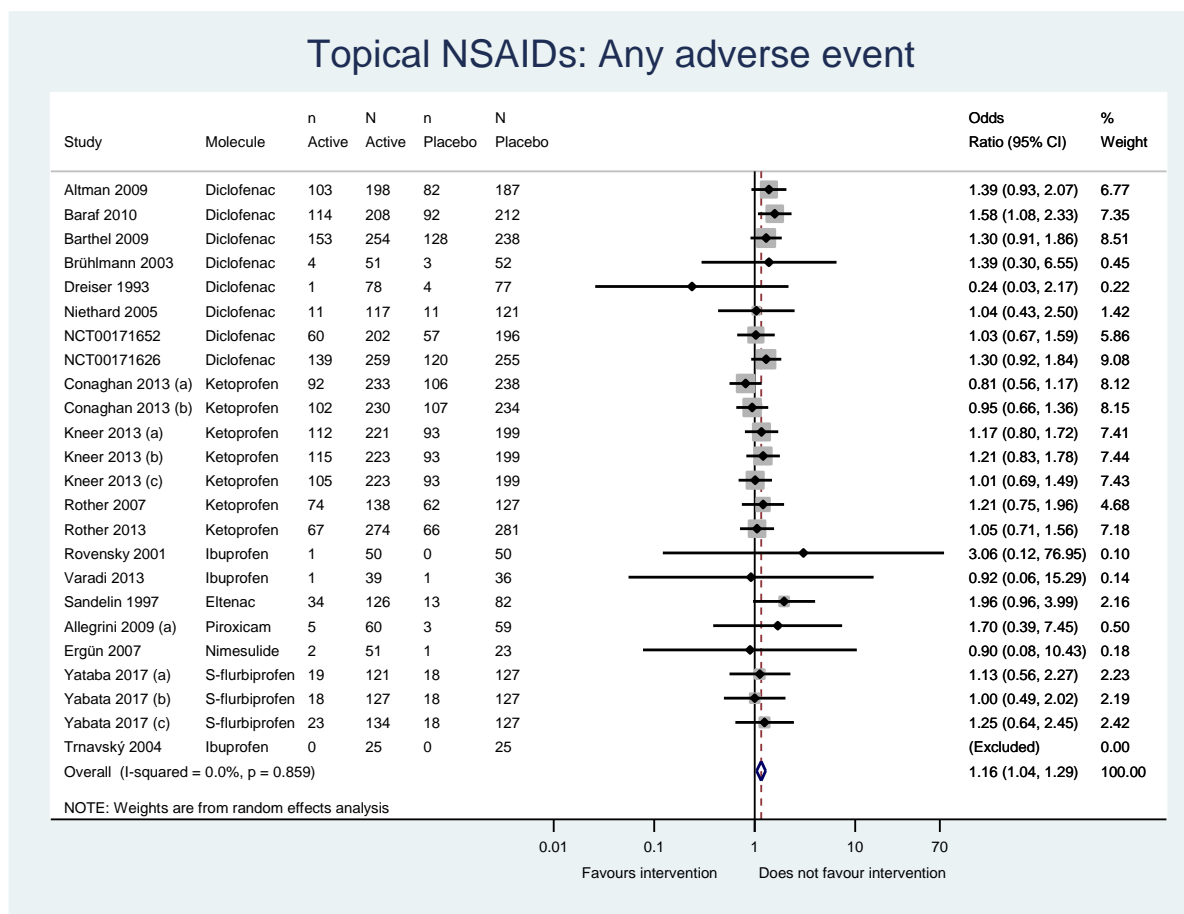

## B) Topical diclofenac

**Figure 16:** Forest plot displaying the result of the meta-analysis comparing skin and subcutaneous tissue disorders with topical diclofenac versus placebo in patients with OA.

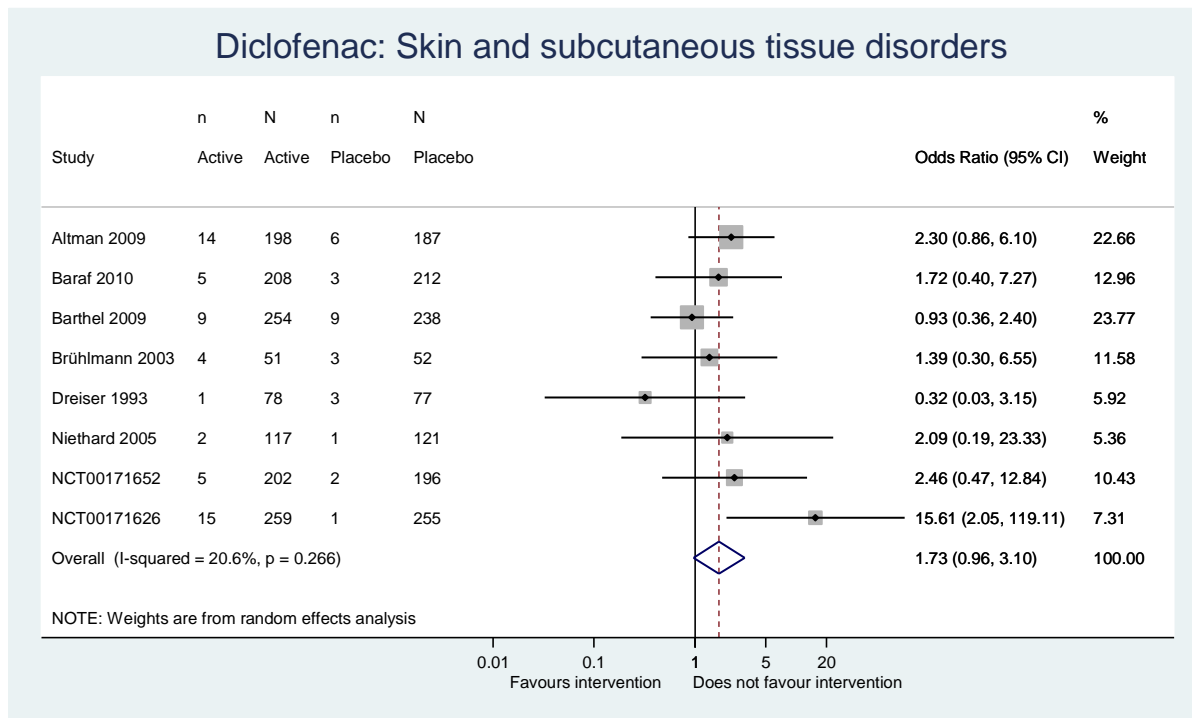

**Figure 17:** Forest plot displaying the result of the meta-analysis comparing cardiac disorders with topical diclofenac versus placebo in patients with OA.

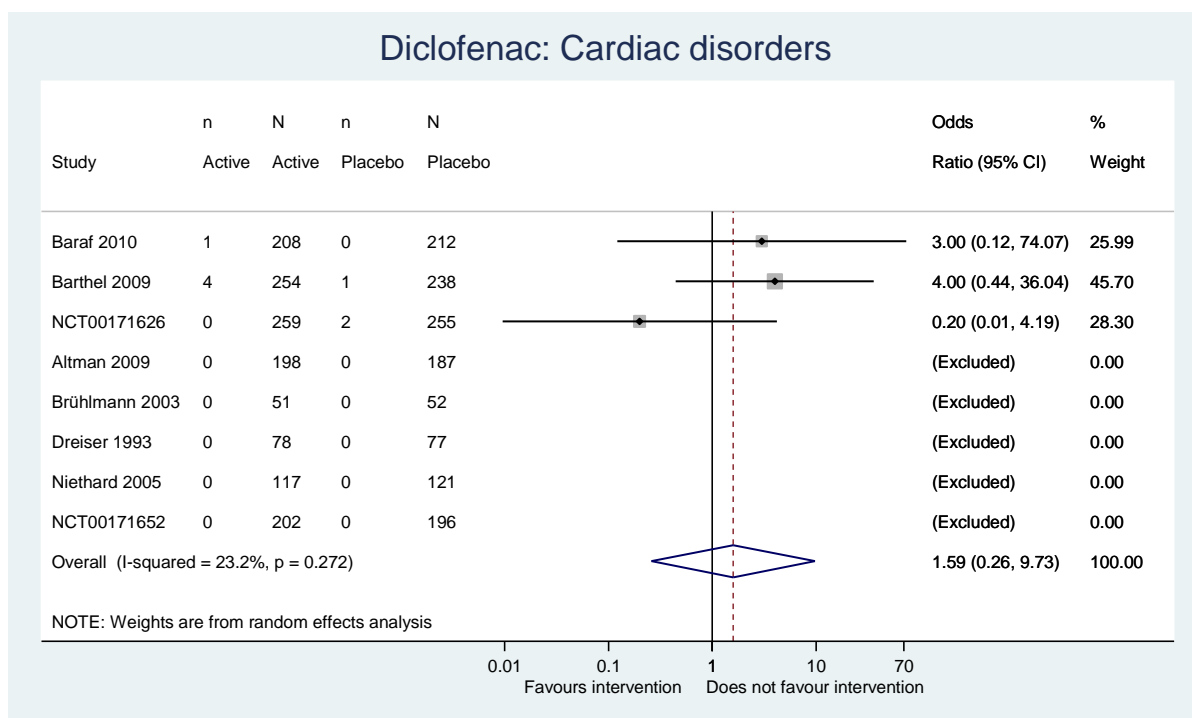

**Figure 18:** Forest plot displaying the result of the meta-analysis comparing vascular disorders with topical diclofenac versus placebo in patients with OA.

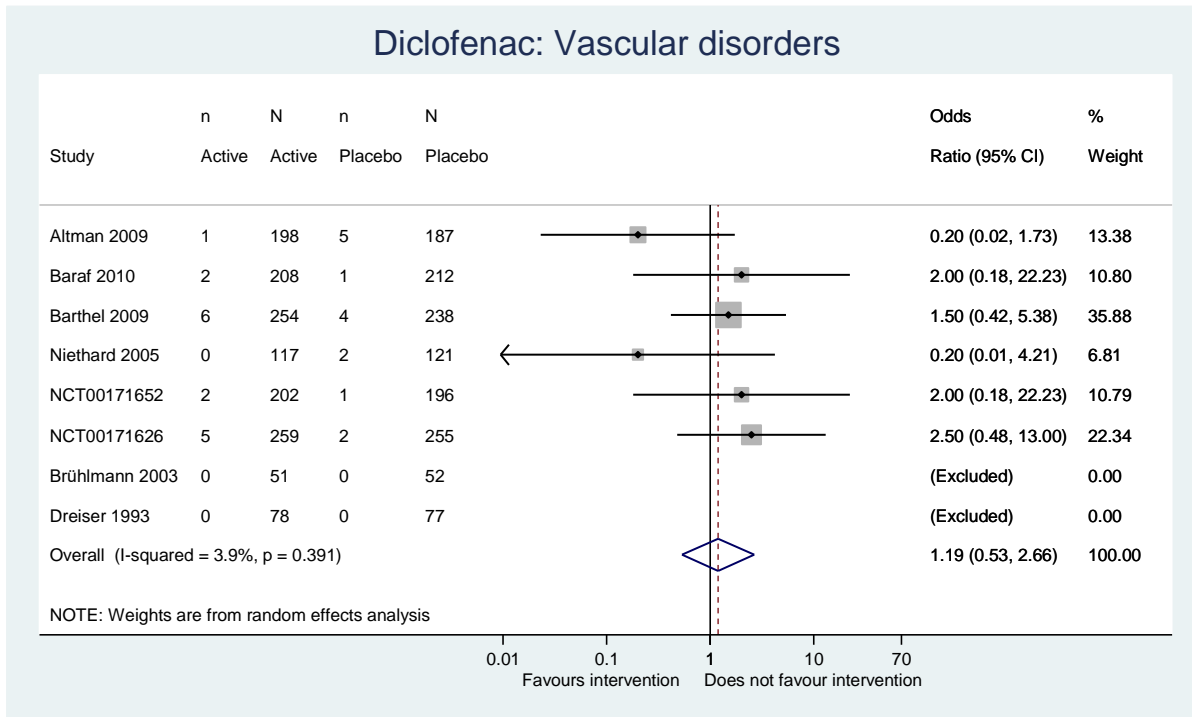

**Figure 19:** Forest plot displaying the result of the meta-analysis comparing nervous system disorders with topical diclofenac versus placebo in patients with OA.

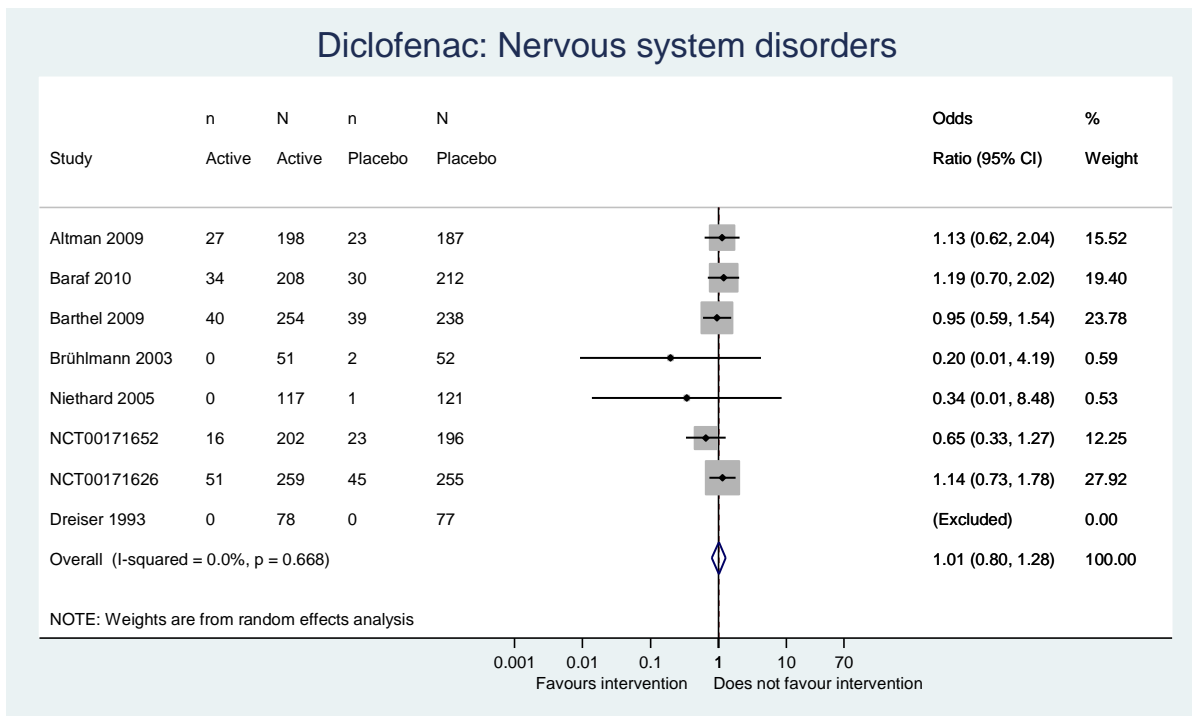

**Figure 20:** Forest plot displaying the result of the meta-analysis comparing musculoskeletal and connective tissue disorders with topical diclofenac versus placebo in patients with OA.

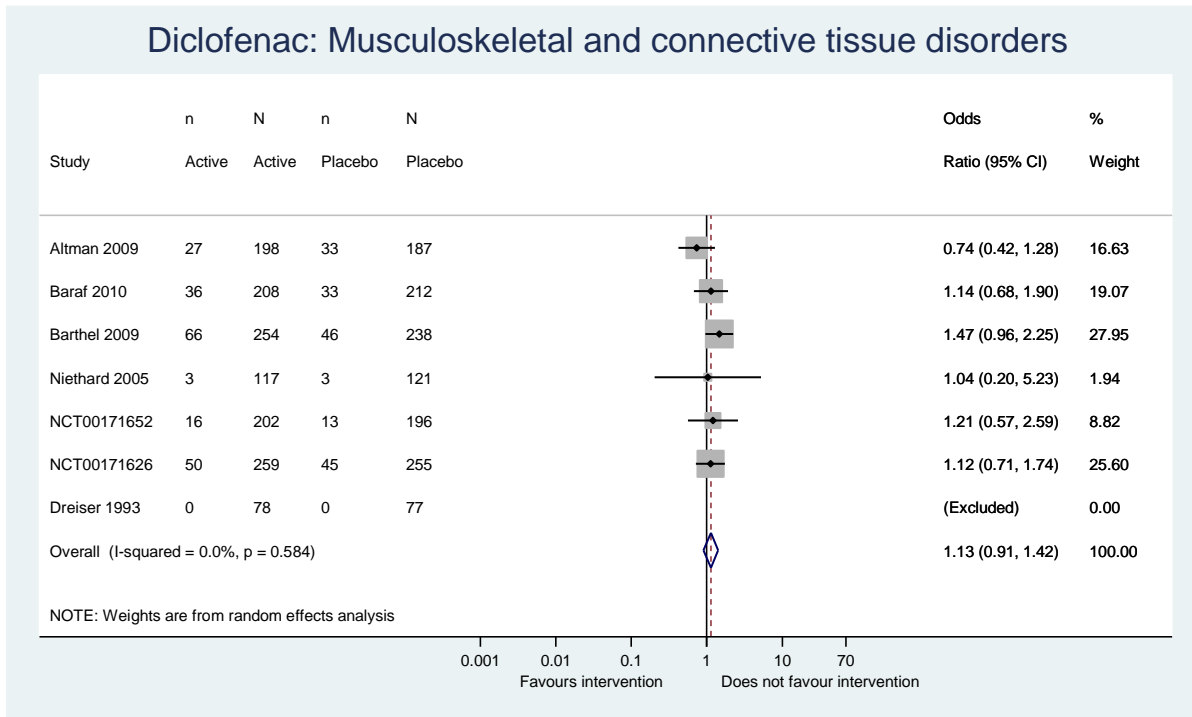

**Figure 21:** Forest plot displaying the result of the meta-analysis comparing severe adverse events with topical diclofenac versus placebo in patients with OA.

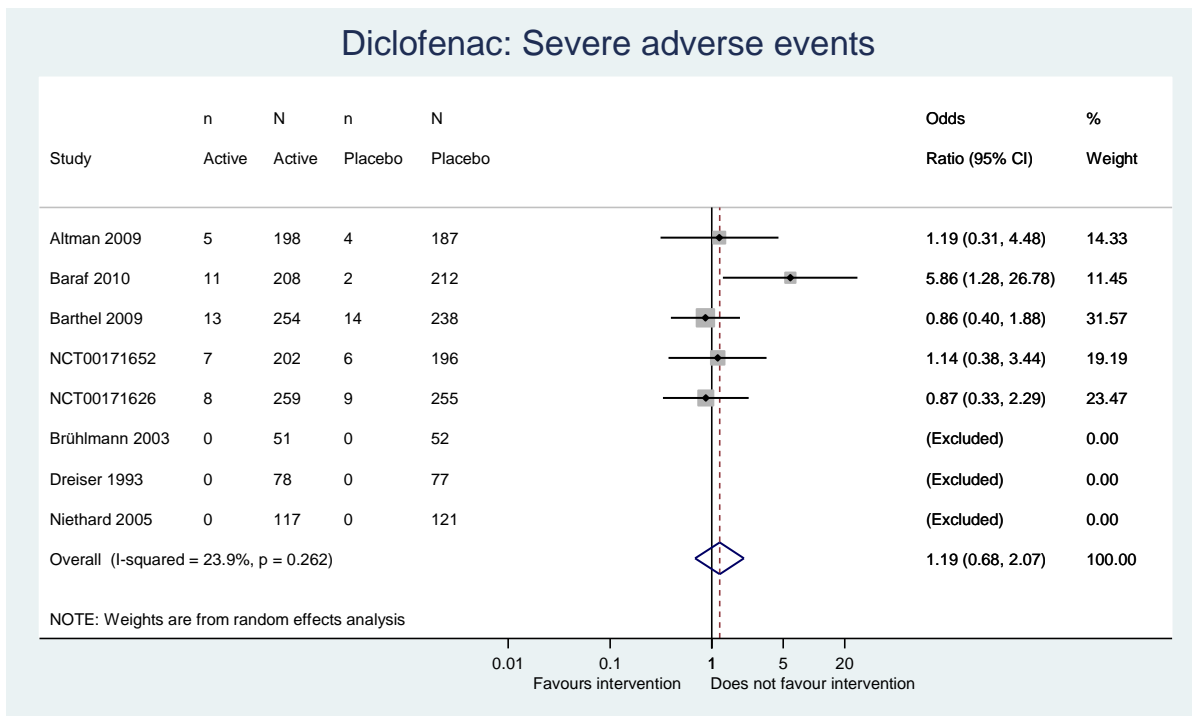

**Figure 22:** Forest plot displaying the result of the meta-analysis comparing serious adverse events with topical diclofenac versus placebo in patients with OA.

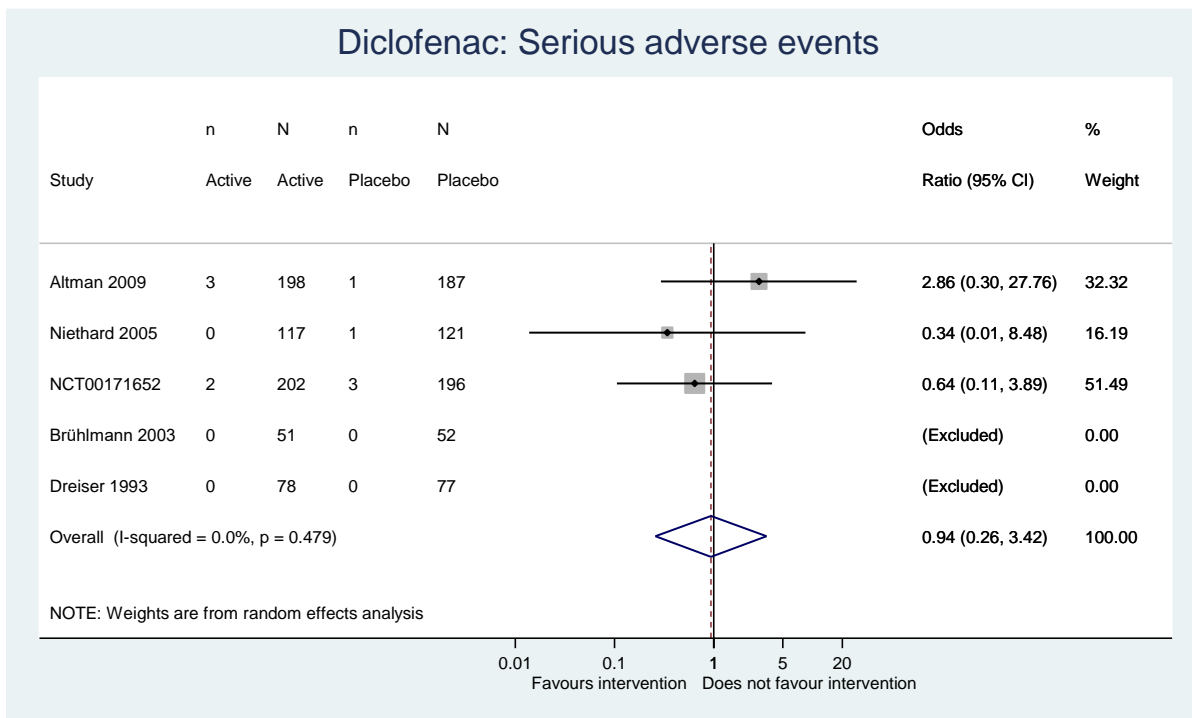

**Figure 23:** Forest plot displaying the result of the meta-analysis comparing dropouts due to adverse events with topical diclofenac versus placebo in patients with OA.

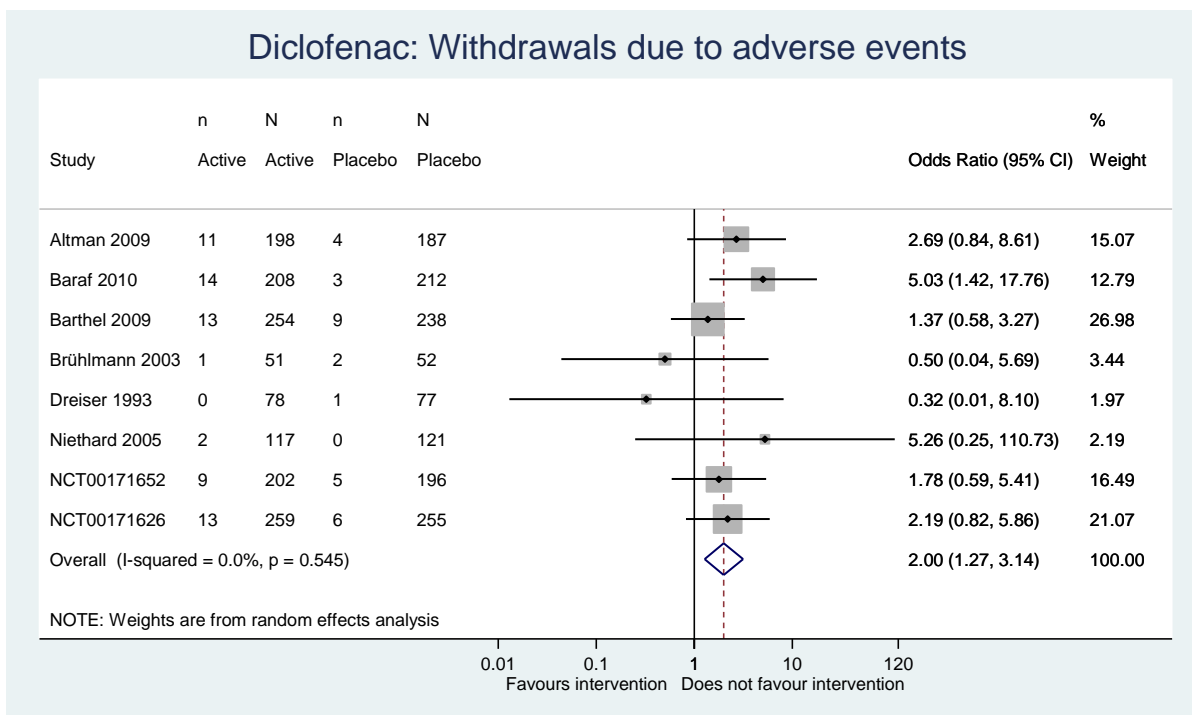

**Figure 24:** Forest plot displaying the result of the meta-analysis comparing total adverse events (Any AEs) with topical diclofenac versus placebo in patients with OA.

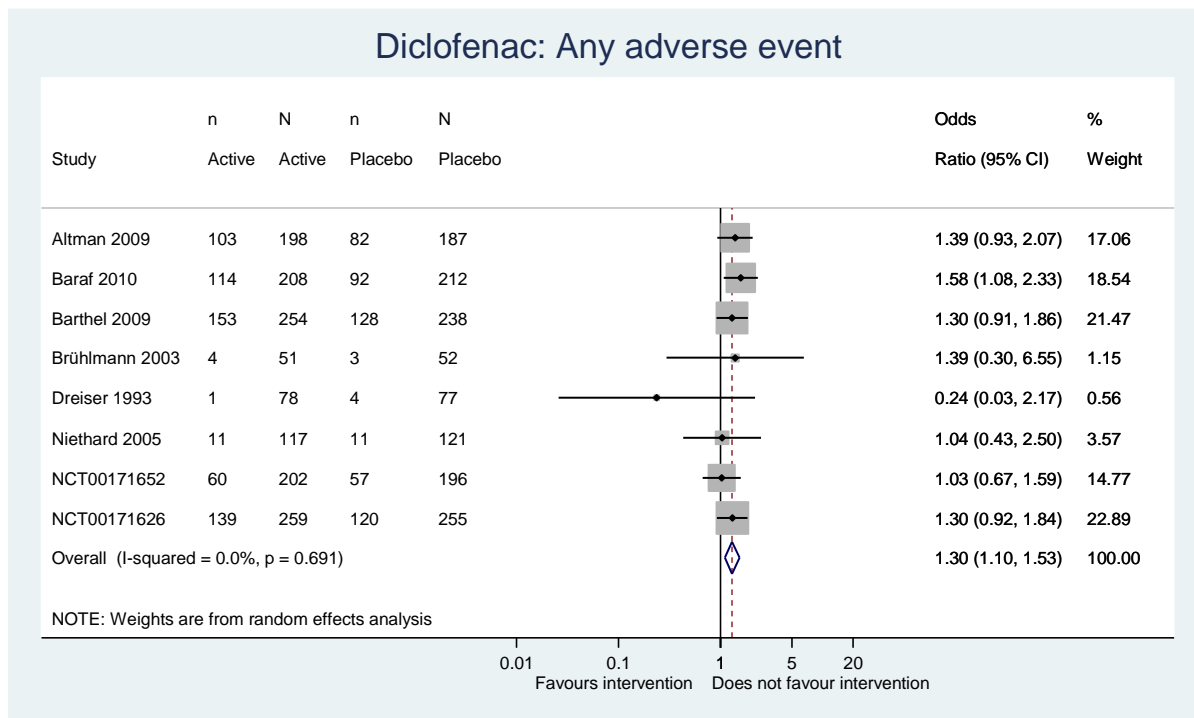

### C) Topical ketoprofen

**Figure 25:** Forest plot displaying the result of the meta-analysis comparing skin and subcutaneous tissue disorders with topical ketoprofen versus placebo in patients with OA.

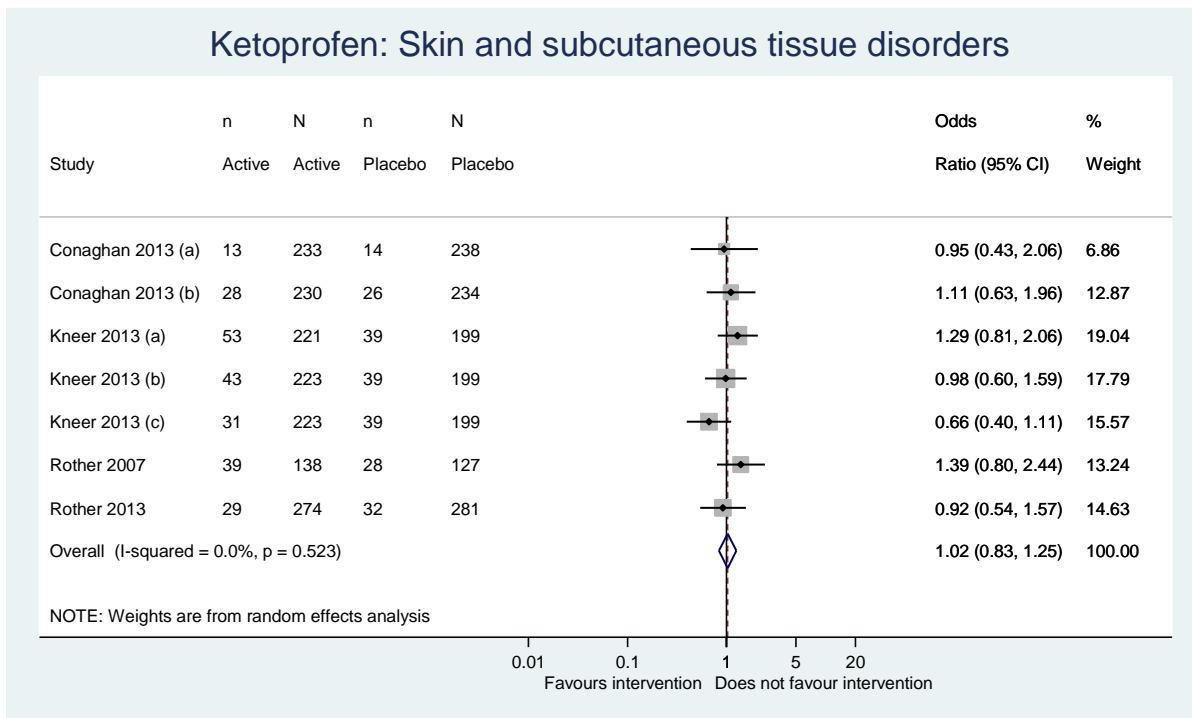

**Figure 26:** Forest plot displaying the result of the meta-analysis comparing gastrointestinal disorders with topical ketoprofen versus placebo in patients with OA.

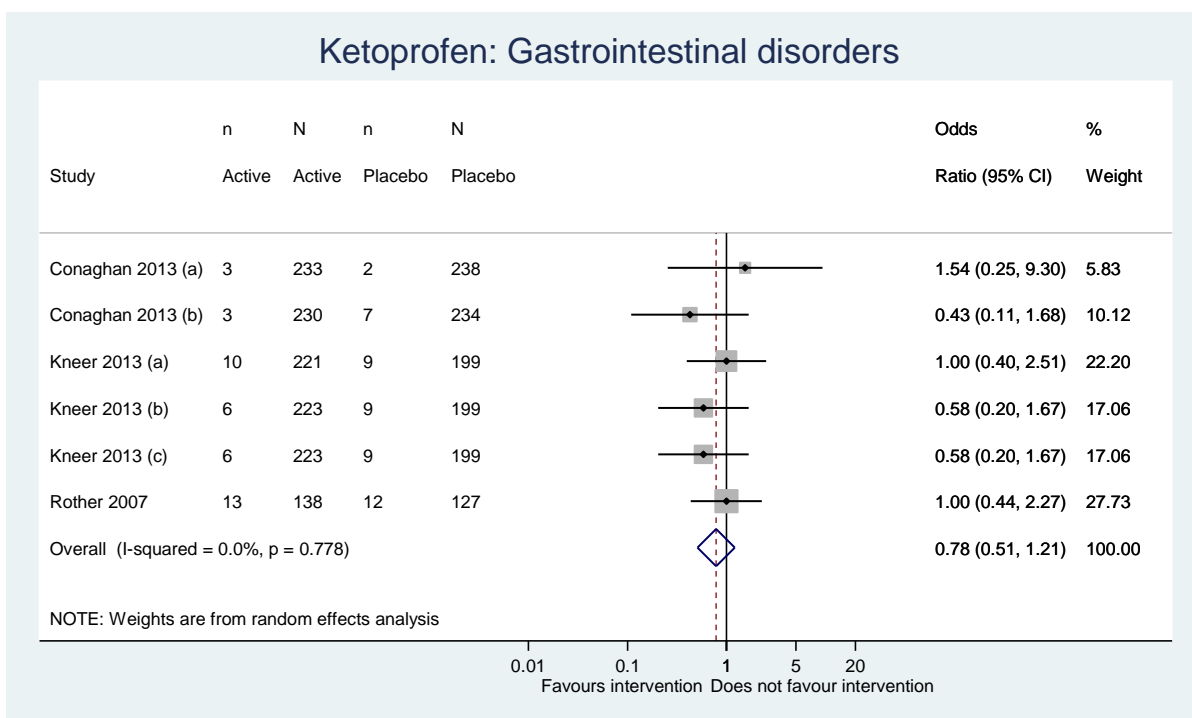



**Figure 27:** Forest plot displaying the result of the meta-analysis comparing cardiac disorders with topical ketoprofen versus placebo in patients with OA.

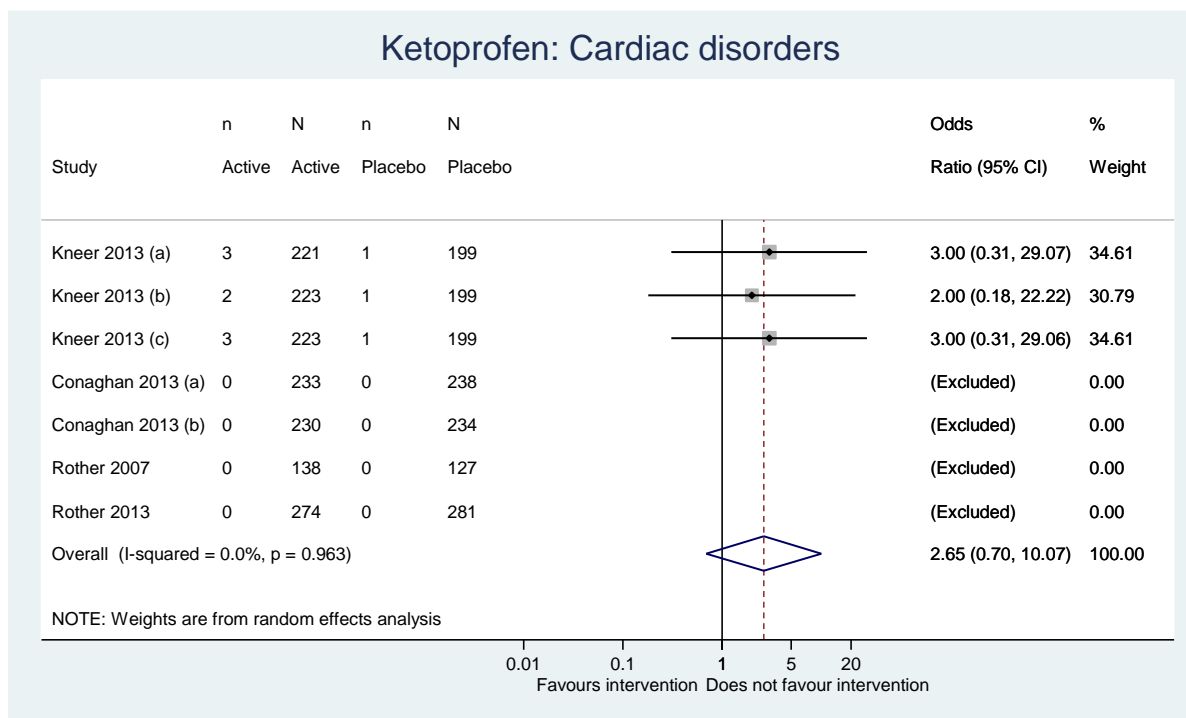

**Figure 28:** Forest plot displaying the result of the meta-analysis comparing vascular disorders with topical ketoprofen versus placebo in patients with OA.

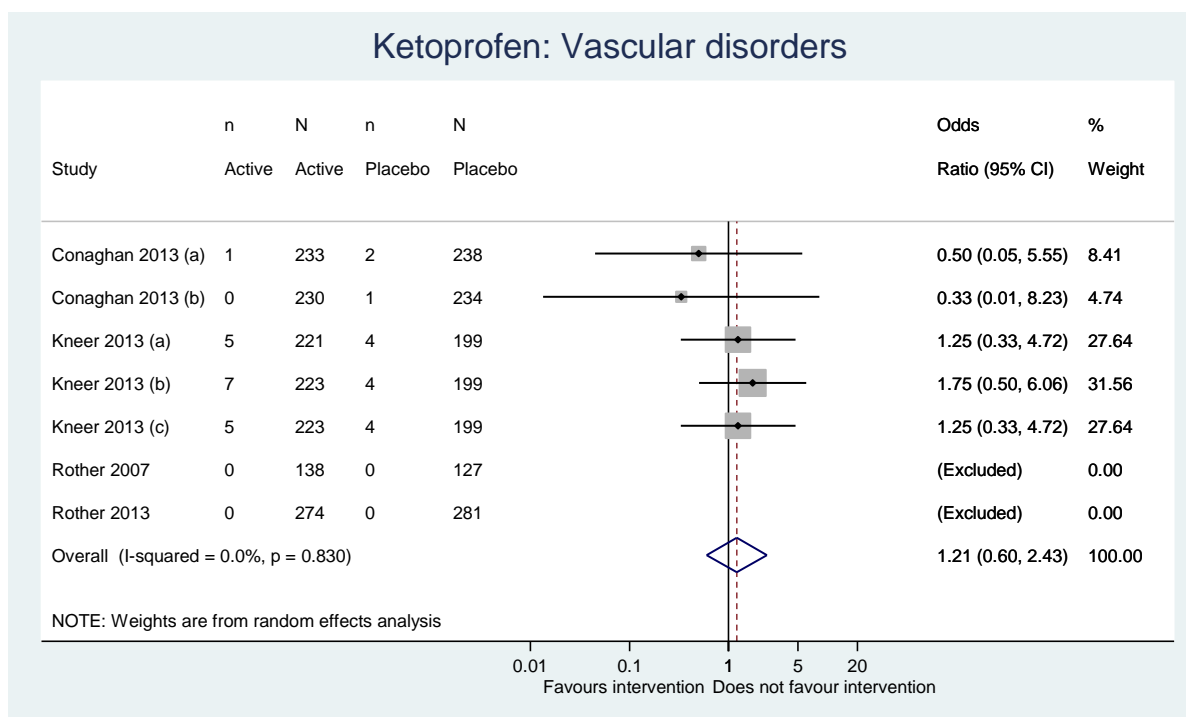

**Figure 29:** Forest plot displaying the result of the meta-analysis comparing nervous system disorders with topical ketoprofen versus placebo in patients with OA.

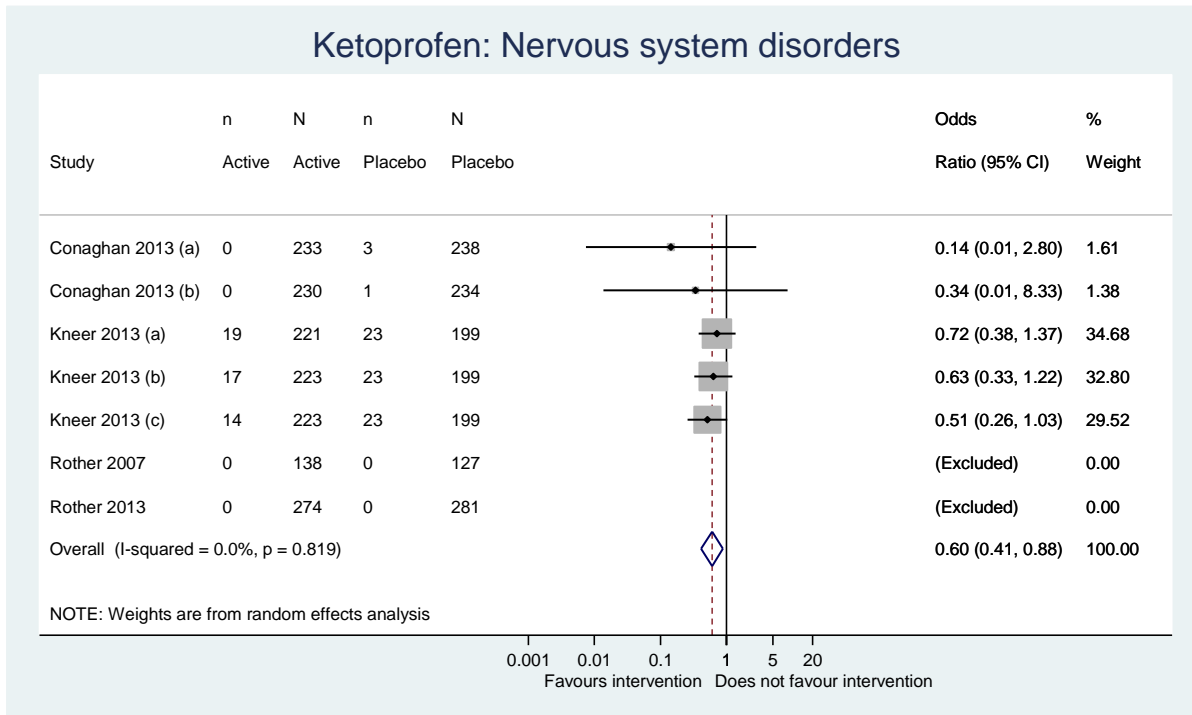

**Figure 30:** Forest plot displaying the result of the meta-analysis comparing musculoskeletal and connective tissue disorders with topical ketoprofen versus placebo in patients with OA.

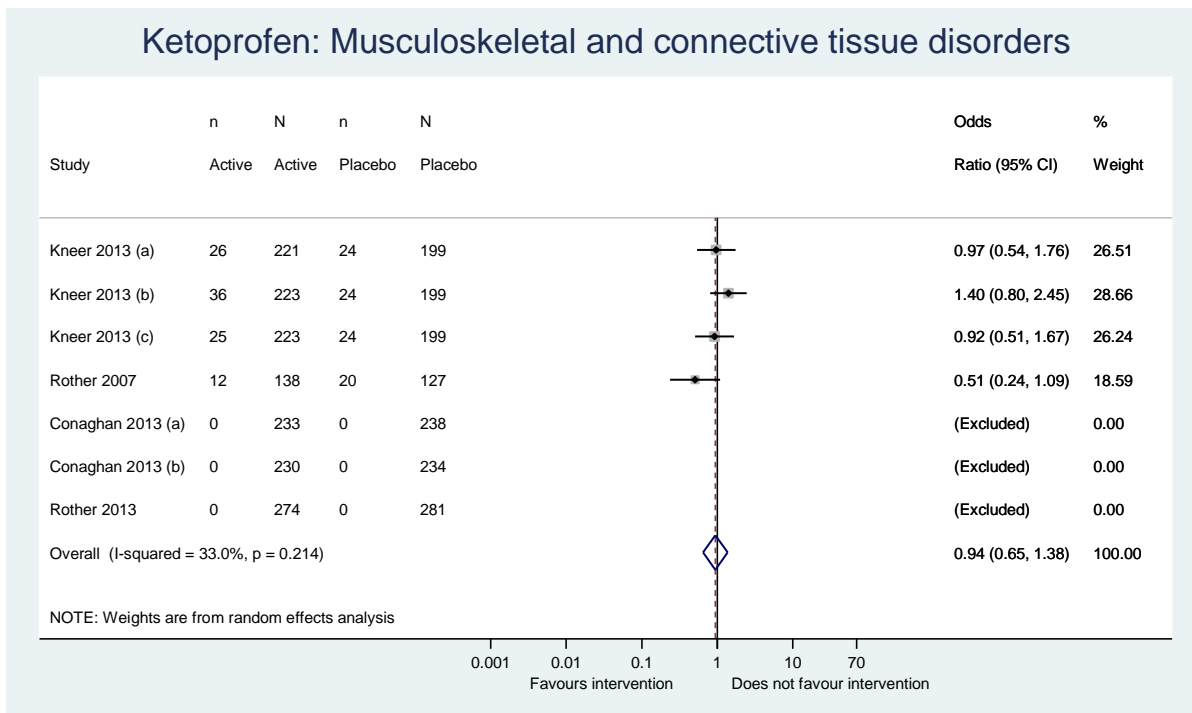

Ketoprofen: Severe adverse events (meta-analysis not possible, since zero events reported by all included studies, both in the intervention and placebo groups)

**Figure 31:** Forest plot displaying the result of the meta-analysis comparing serious adverse events with topical ketoprofen versus placebo in patients with OA.

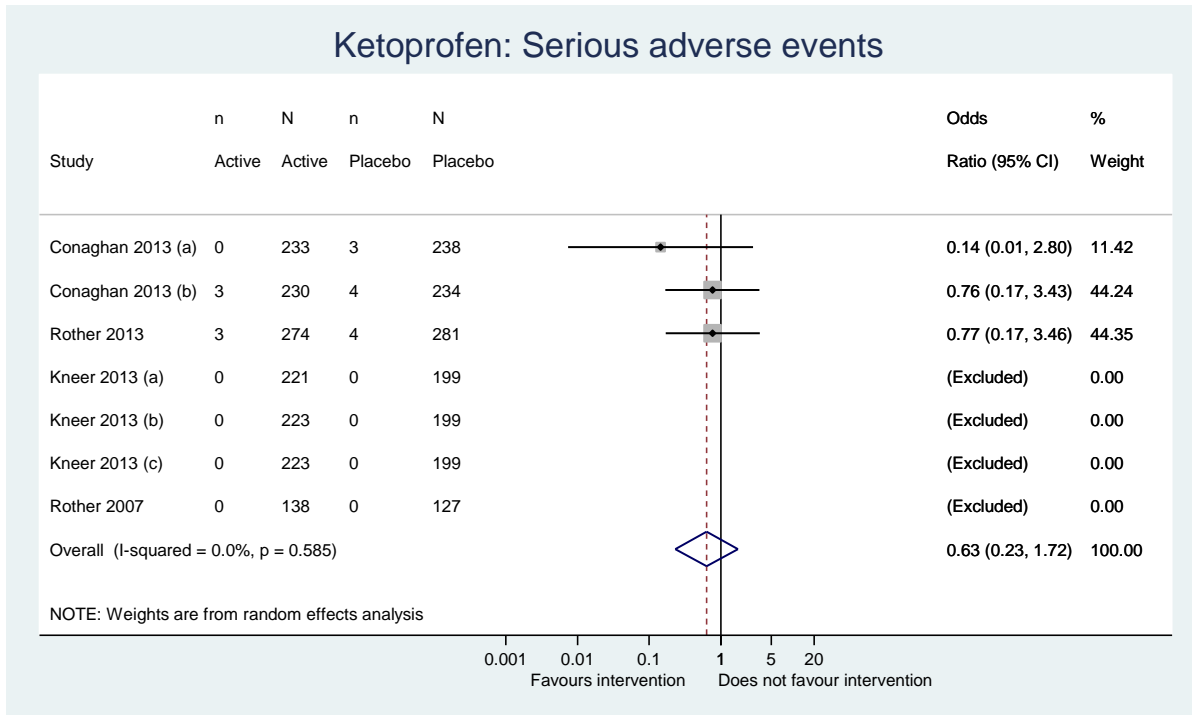

**Figure 32:** Forest plot displaying the result of the meta-analysis comparing dropouts due to adverse events with topical ketoprofen versus placebo in patients with OA.

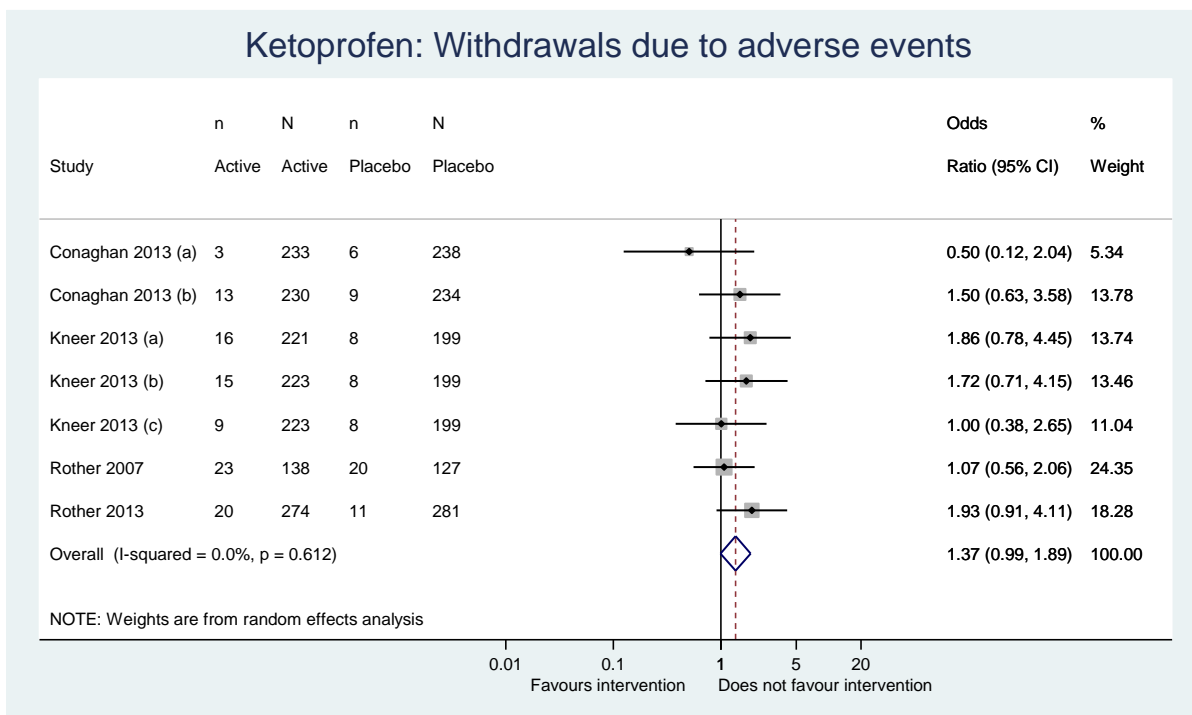

**Figure 33:** Forest plot displaying the result of the meta-analysis comparing total adverse events (Any AEs) with topical ketoprofen versus placebo in patients with OA.

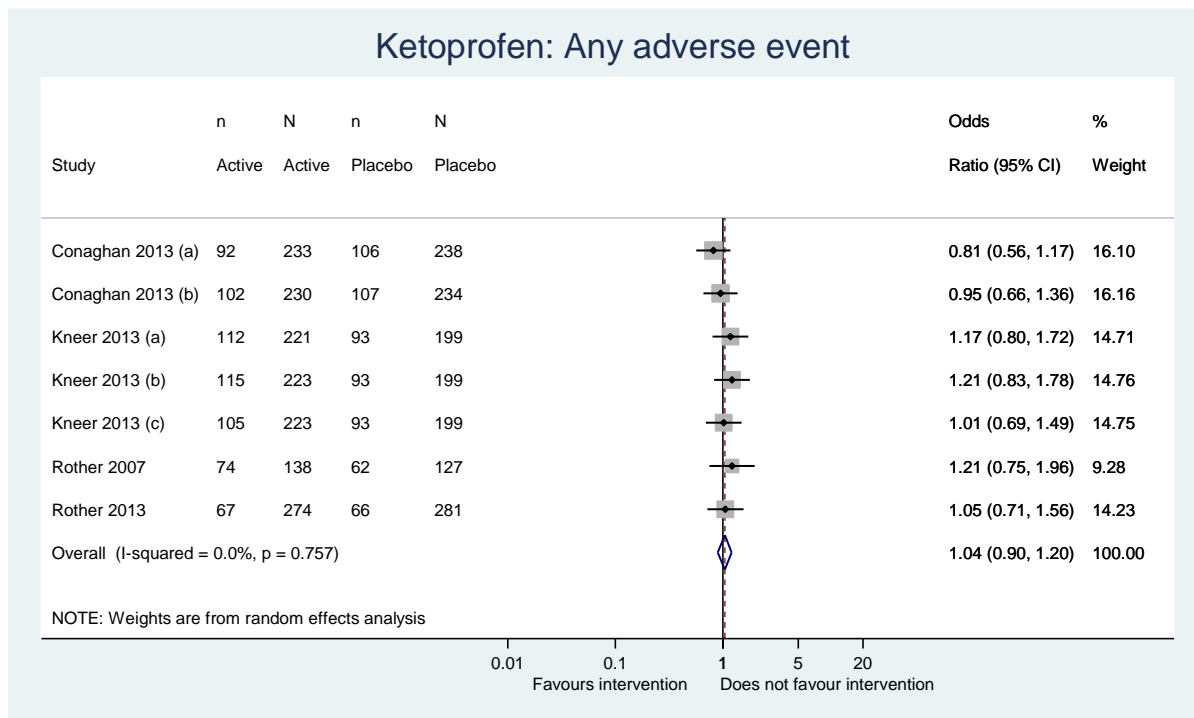

**D) Ibuprofen**

**Figure 34:** Forest plot displaying the result of the meta-analysis comparing skin and subcutaneous tissue disorders with topical ibuprofen versus placebo in patients with OA.

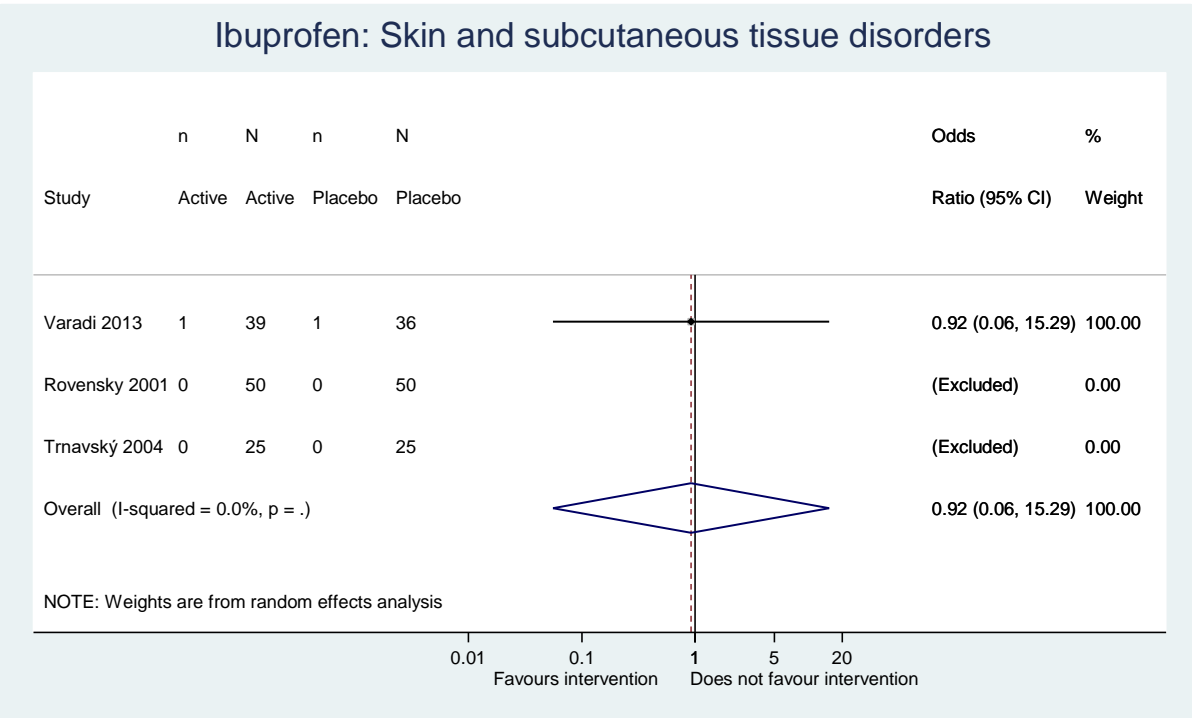

Ibuprofen: for gastrointestinal disorders, cardiac disorders, vascular disorders, nervous system disorders, musculoskeletal and connective tissue disorders, zero adverse events were reported in both the intervention and placebo groups.

**Figure 35:** Forest plot displaying the result of the meta-analysis comparing severe adverse events with topical ibuprofen versus placebo in patients with OA.

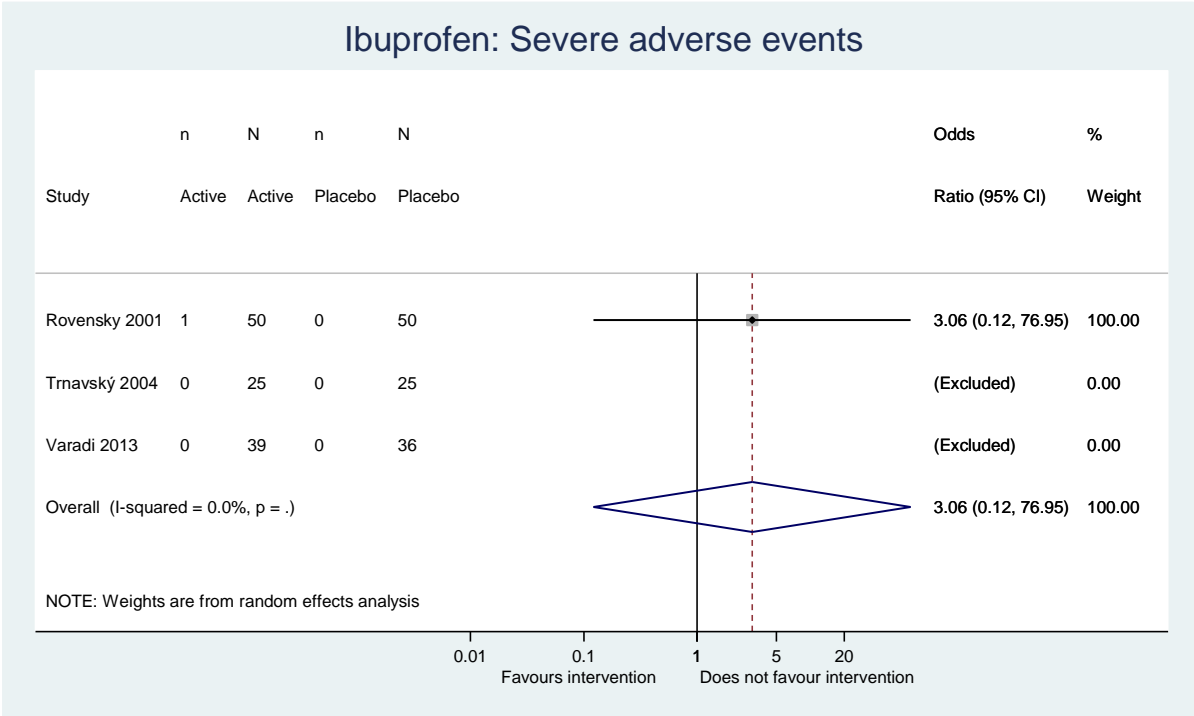

Ibuprofen: zero serious adverse events were reported in both the intervention and placebo groups.

**Figure 36:** Forest plot displaying the result of the meta-analysis comparing dropouts due to adverse events with topical ibuprofen versus placebo in patients with OA.

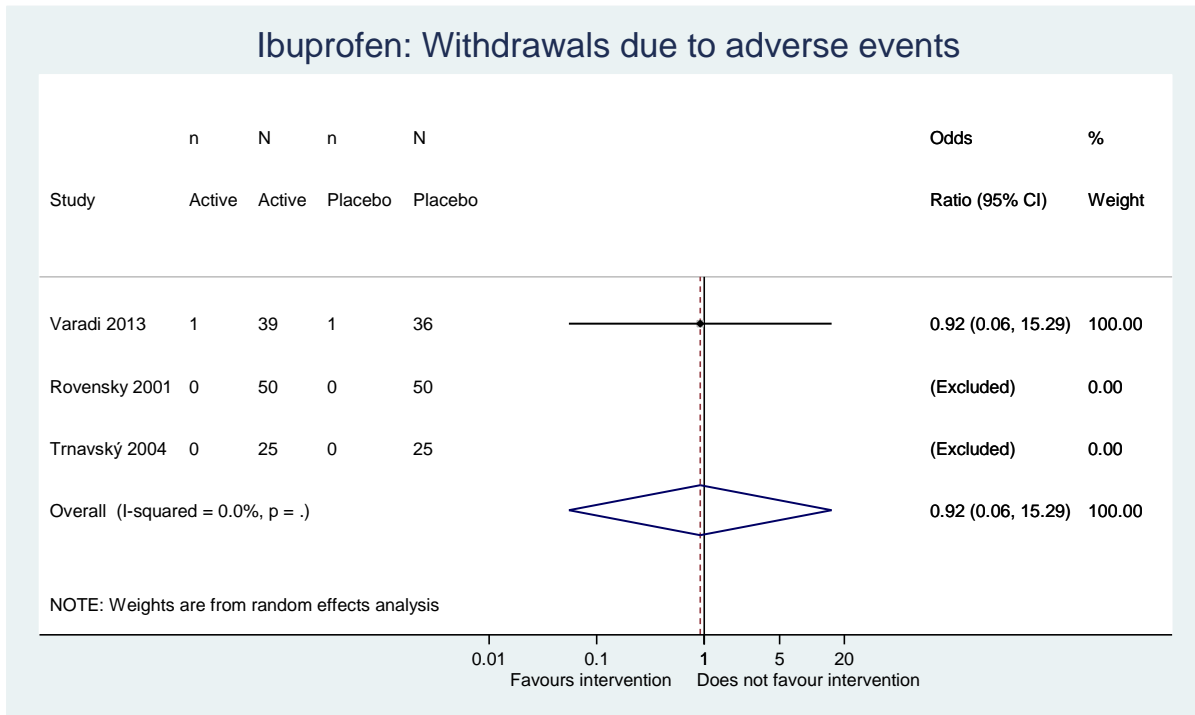

**Figure 37:** Forest plot displaying the result of the meta-analysis comparing total adverse events (Any AEs) with topical ibuprofen versus placebo in patients with OA.

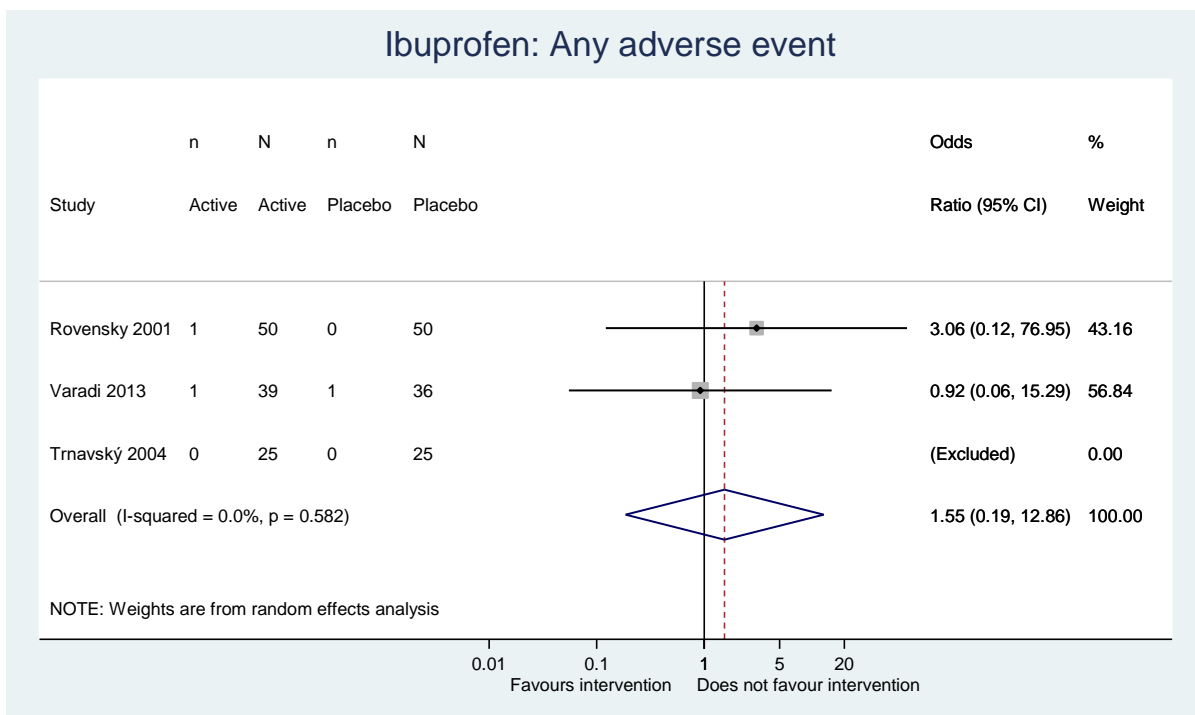

Supplement: 40266_2019_661_MOESM2_ESM.pdf [file 40266_2019_661_MOESM2_ESM.pdf]
