# Supplementary material for: Safety of Topical Non-steroidal Anti-Inflammatory Drugs in Osteoarthritis: Outcomes of a Systematic Review and Meta-Analysis
Source: PubMed Central journal article supplement — Drugs Aging. 2019 May 9;36(Suppl 1):45–64. doi: 10.1007/s40266-019-00661-0 (PMC6509095; doi:10.1007/s40266-019-00661-0), 2019-05-09

**Supplement: Safety of Anti-Osteoarthritis Medications**

**Safety of topical non-steroidal anti-inflammatory drugs in osteoarthritis: Outcomes of a systematic review and meta-analysis**

Germain Honvo, Victoria Leclercq, Anton Geerinck, Thierry Thomas, Nicola Veronese, Alexia Charles, Véronique Rabenda, Charlotte Beaudart, Cyrus Cooper, Jean-Yves Reginster, Olivier Bruyère

**ELECTRONIC SUPPLEMENTARY MATERIAL 4**

**1. Subgroup analyses of “Any adverse event” (total adverse events) with topical diclofenac versus placebo in patients with osteoarthritis (OA)**

**Figure 64:** Meta-analysis of “Any Adverse event” with topical diclofenac versus placebo in patients with OA, by OA location

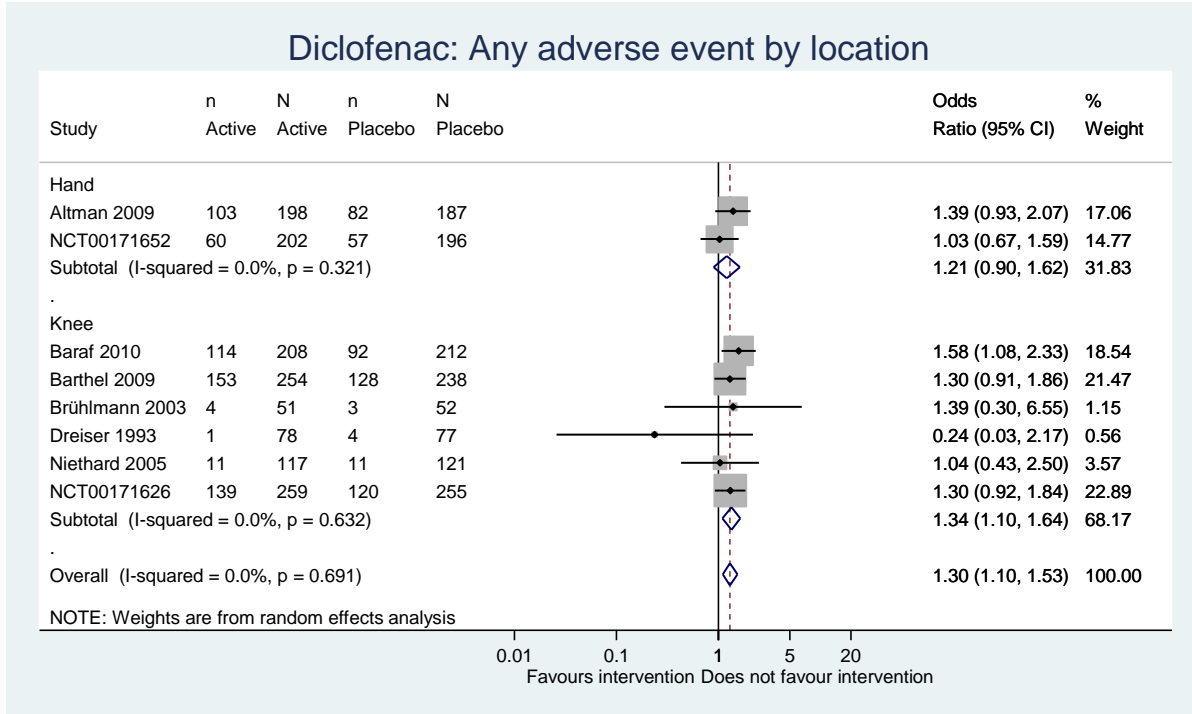

**Figure 65:** Meta-analysis of “Any Adverse event” with topical diclofenac versus placebo in patients with OA, by topical formulation (Gel, Cream, etc.)

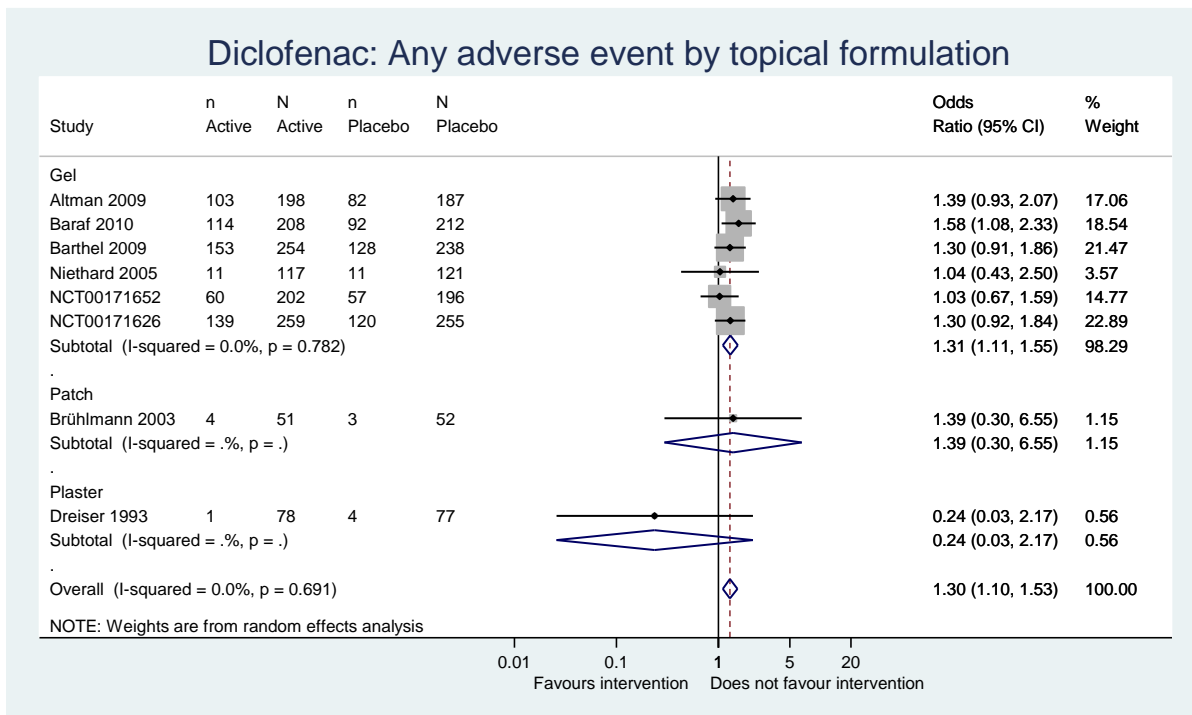

**Figure 66:** Meta-analysis of “Any Adverse event” with topical diclofenac versus placebo in patients with OA, by daily dose (mg)

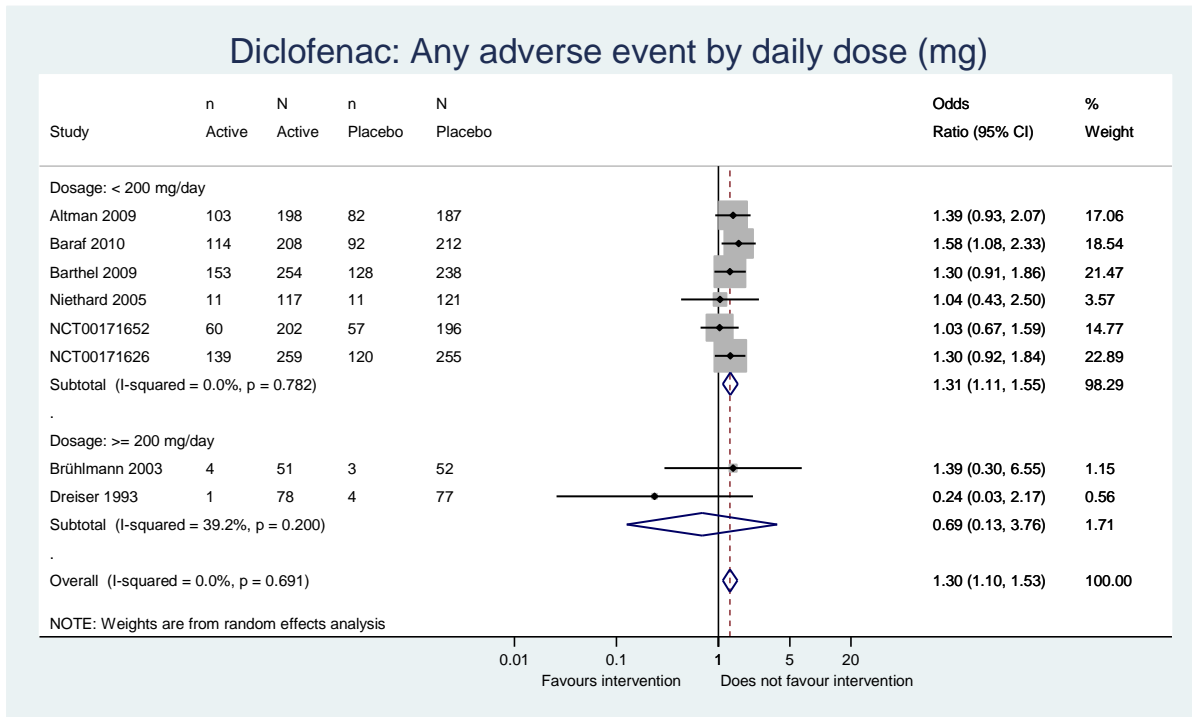

**Figure 67:** Meta-analysis of “Any Adverse event” with topical diclofenac versus placebo in patients with OA, by study duration (in weeks)

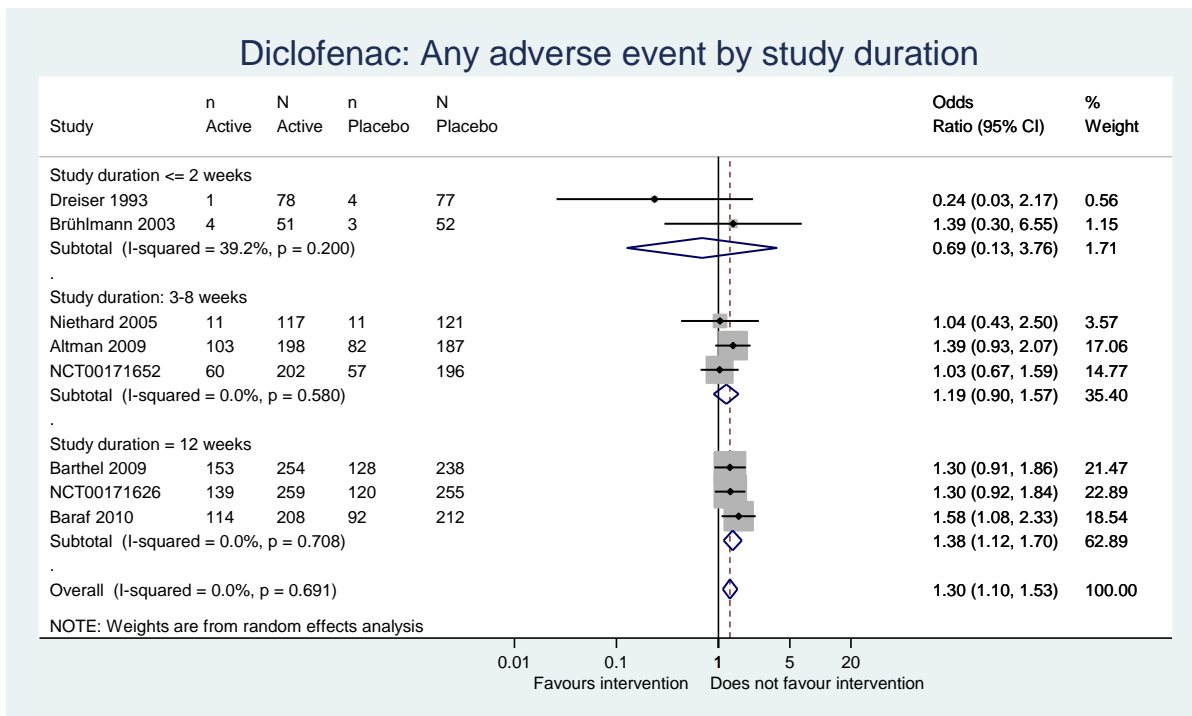

## 2. Subgroup analyses of “Withdrawal due to adverse events” with topical diclofenac versus placebo in patients with OA

**Figure 68:** Meta-analysis of “Withdrawal due to adverse events” with topical diclofenac versus placebo in patients with OA, by OA location

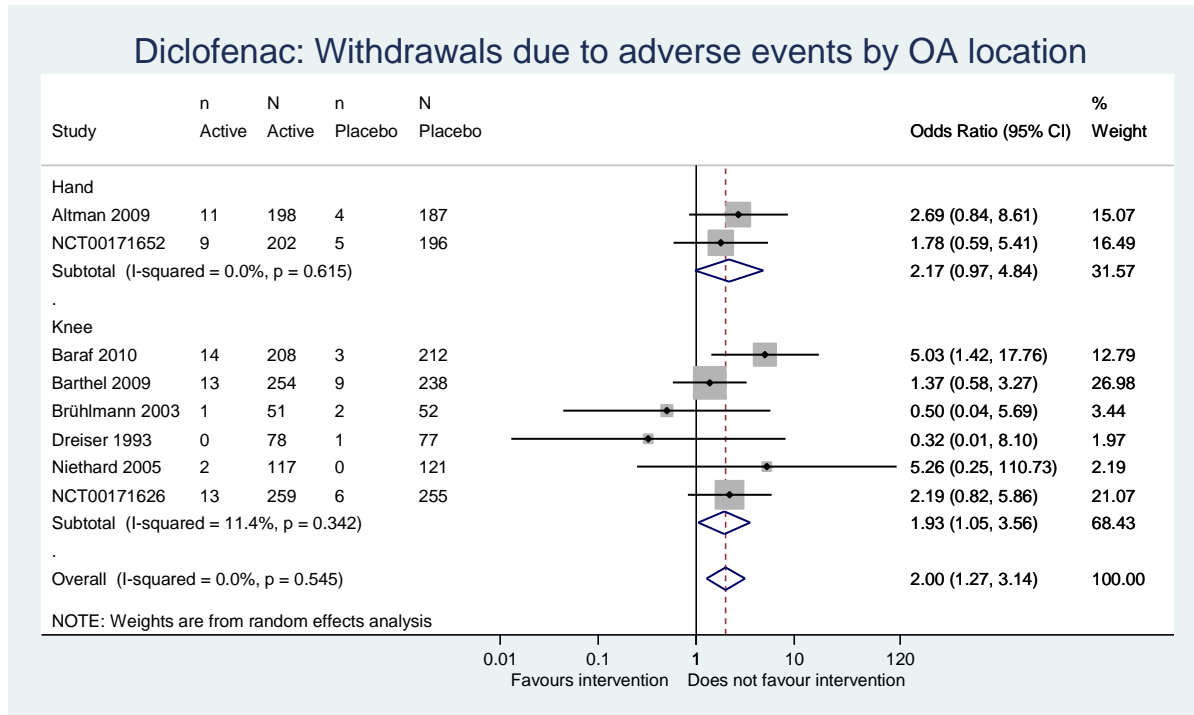

**Figure 69:** Meta-analysis of “Withdrawal due to adverse events” with topical diclofenac versus placebo in patients with OA, by topical formulation (Gel, Cream, etc.)

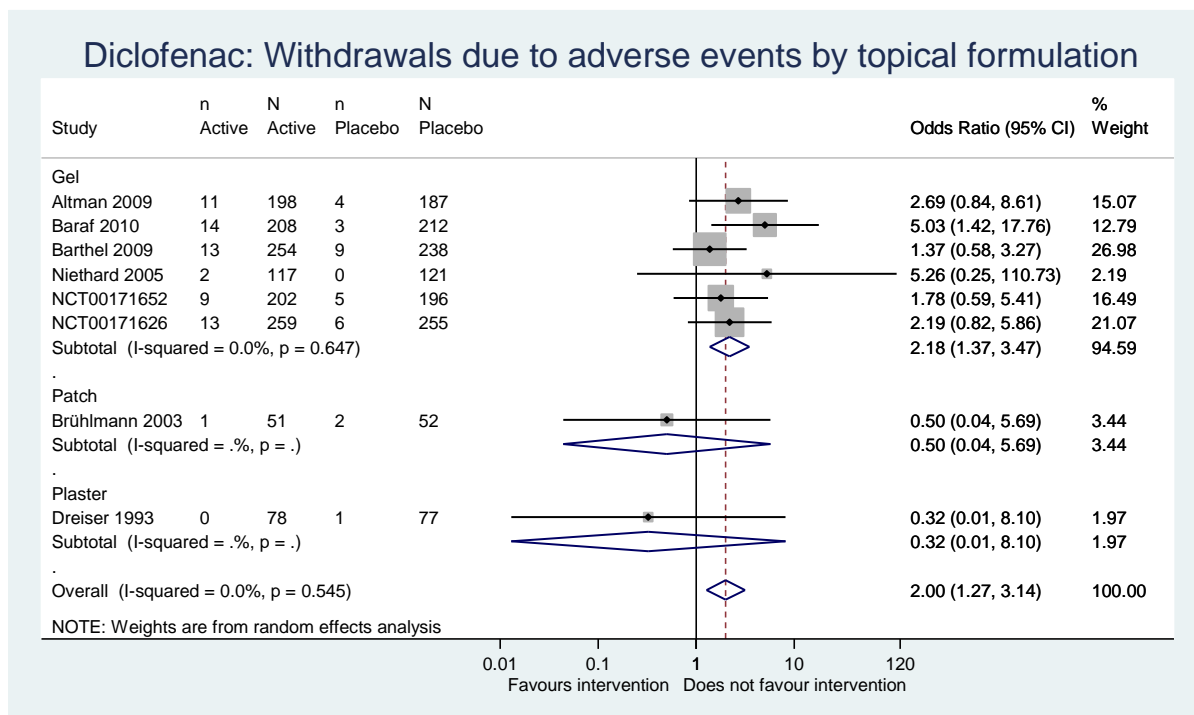

**Figure 70:** Meta-analysis of “Withdrawal due to adverse events” with topical diclofenac versus placebo in patients with OA, by daily dose (mg)

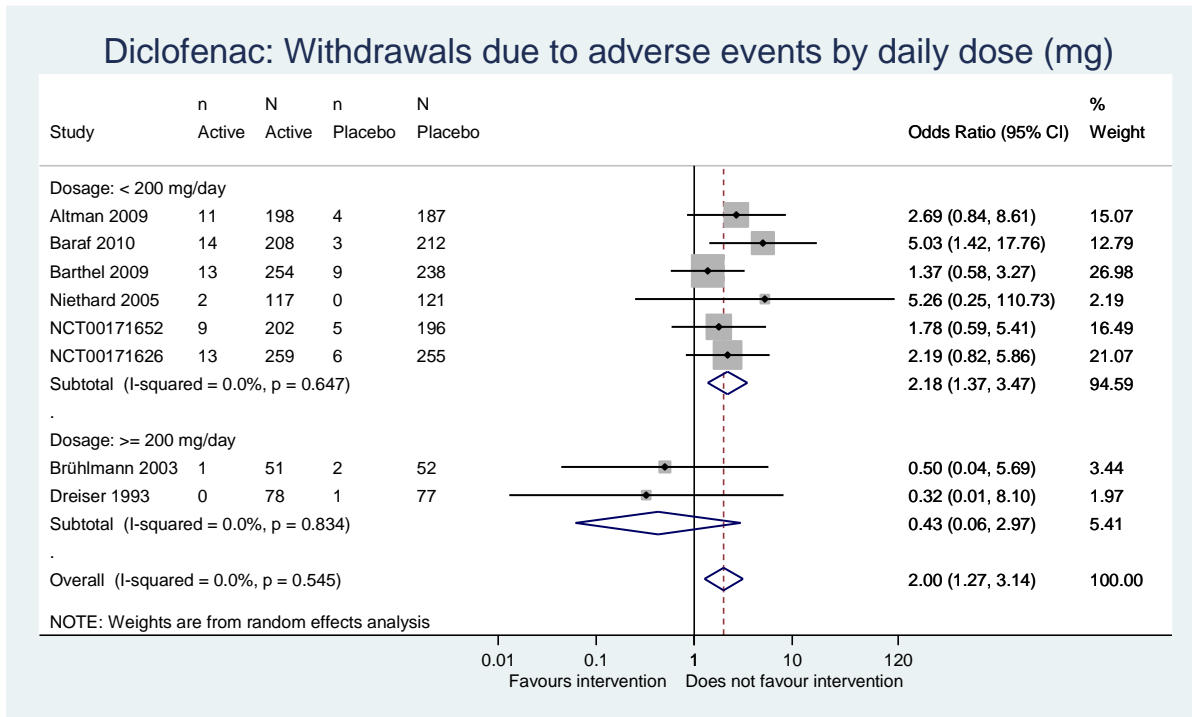

**Figure 71:** Meta-analysis of “Withdrawal due to adverse events” with topical diclofenac versus placebo in patients with OA, by study duration (in weeks)

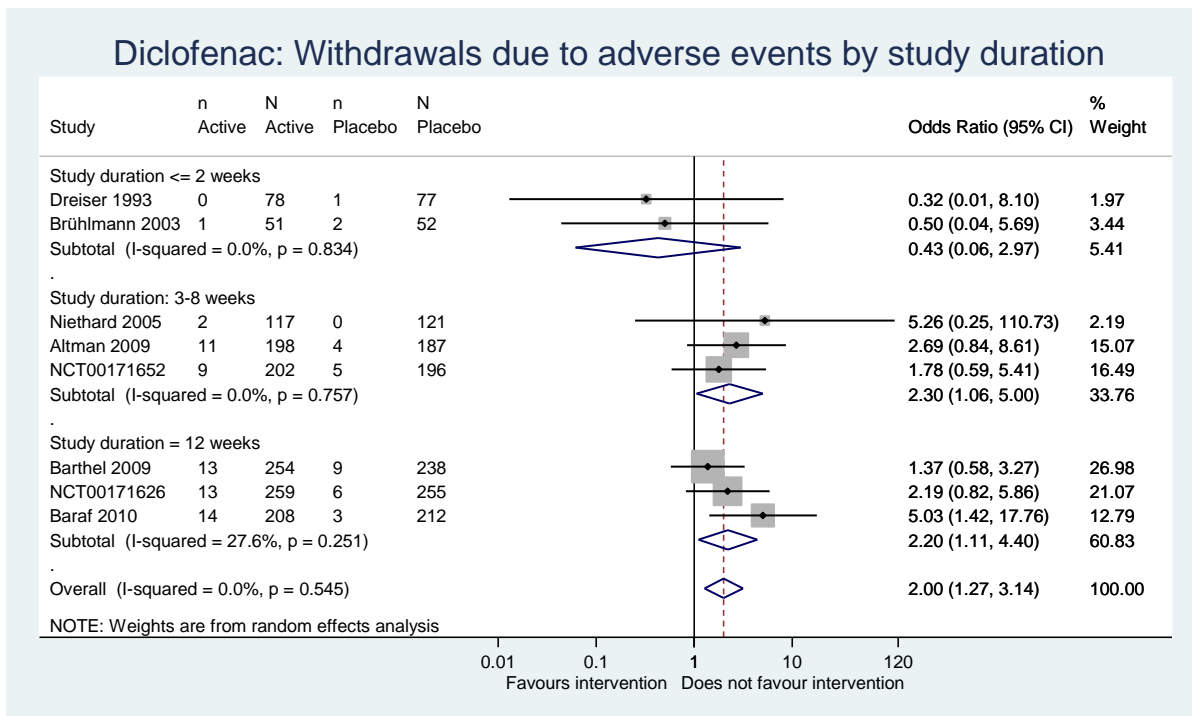

Supplement: 40266_2019_661_MOESM4_ESM.pdf [file 40266_2019_661_MOESM4_ESM.pdf]
