# Supplementary material for: Safety of Topical Non-steroidal Anti-Inflammatory Drugs in Osteoarthritis: Outcomes of a Systematic Review and Meta-Analysis
Source: PubMed Central journal article supplement — Drugs Aging. 2019 May 9;36(Suppl 1):45–64. doi: 10.1007/s40266-019-00661-0 (PMC6509095; doi:10.1007/s40266-019-00661-0), 2019-05-09
Supplement: 40266_2019_661_MOESM1_ESM.pdf [file 40266_2019_661_MOESM1_ESM.pdf]

**Drugs and Aging, 2019**

**Supplement: Safety of Anti-Osteoarthritis Medications**

**Safety of topical non-steroidal anti-inflammatory drugs in osteoarthritis: Outcomes of a systematic review and meta-analysis**

Germain Honvo, Victoria Leclercq, Anton Geerinck, Thierry Thomas, Nicola Veronese, Alexia Charles, Véronique Rabenda, Charlotte Beaudart, Cyrus Cooper, Jean-Yves Reginster, Olivier Bruyère

**ELECTRONIC SUPPLEMENTARY MATERIAL 1**

**Subject:** Topical NSAIDs in Osteoarthritis

**Database:** Ovid MEDLINE(R) Epub Ahead of Print, In-Process & Other Non-Indexed Citations, Ovid MEDLINE(R) Daily and Ovid MEDLINE(R) <1946 to Present>

**Search Strategy:**

---

1. exp Osteoarthritis/
2. (degenerative adj (arthritis OR joint\*1 OR arthritides)).ti,ab,kw.
3. (osteoarthr\* OR arthros\* OR coxarthros\* OR gonarthros\* OR joint failure\*1 OR osteo-arthritis OR OA).ti,ab,kw.
4. 1 OR 2 OR 3
5. exp Anti-Inflammatory Agents, Non-Steroidal/
6. NSAID\*1.ti,ab,kw.
7. ((nonsteroidal OR "non steroidal" OR non-steroidal) adj2 ("anti inflammator\*" OR antiinflammator\* OR "anti-inflammator\*")).ti,ab,kw.
8. ((Cyclo-oxygenase OR Cyclooxygenase OR Cyclo oxygenase OR cox) adj2 inhibit\*).ti,ab,kw.
9. (Aceclofenac OR Acemetacin OR Alminoprofen OR Aminophenazone OR Aminopropylone OR Ampiroxicam OR "Amtolmetin Guacil" OR Azapropazone OR Bendazac OR Benoxaprofen OR Benzydamine OR Beta-aminopropionitrile OR Bromfenac OR Bufexamac OR Bumadizone OR "Butibufen Sodium" OR Carprofen OR Celecoxib OR Clofexamide OR Clofezone OR Clonixin OR Dexibuprofen OR Diclofenac OR Dipyron OR Eitenac OR Epirizole OR Etodolac OR Etofenamate OR Etoricoxib OR Felbinac OR Fenbufen OR Fenoprofen OR Fentiazac OR Fepradinol OR Feprazone OR Firocoxib OR Floctafenine OR "Flufenamic Acid" OR Flunixin OR Flurbiprofen OR Furprofen OR Glafenine OR Glucametacin OR Ibuprofen OR Ibuproxam OR Indometacin OR Isonixin OR Kebuzone OR Ketoprofen OR Ketorolac OR Lonazolac OR Lornoxicam OR Loxoprofen OR Lumiracoxib OR "Meclofenamic Acid" OR "Mefenamic Acid" OR Meloxicam OR Mofebutazone OR Mofezolac OR Morniflumate OR Nabumetone OR Naproxen OR Nepafenac OR "Niflumic Acid" OR Nimesulide OR Oxaprozin OR Oxyphenbutazone OR Parecoxib OR Phenazone OR Phenylbutazone OR Piketoprofen OR Piroxicam OR Pranoprofen OR Proglumetacin OR Propyphenazone OR Proquazone OR Ramifenazone OR Rofecoxib OR Sulindac OR Suprofen OR Suxibuzone OR Tenoxicam OR Tepoxalin OR Tetrildamine OR "Tiaprofenic Acid" OR Tiaramide OR "Tolfenamic Acid" OR Tolmetin OR Valdecoxib OR Vedaprofen OR Zaltoprofen).ti,ab,kw.
10. (Voltaren OR Apazone OR Indomethacin OR Etofenamat OR biarison OR Eumotol OR Brufen OR Phenylprenazone OR Droxyaryl OR bindazac OR Benzidamine OR diclophenac OR dicrofenac OR floctafenin OR Fluriproben OR Glaphenine OR Glafenin OR glucometacin\*1 OR glucametacine OR kebuson OR Oxyphenylbutazone OR Diphenylbutazone OR Feldene OR propylphenazone).ti,ab,kw.
11. 5 OR 6 OR 7 OR 8 OR 9 OR 10
12. exp Administration, Topical/
13. (Topical OR Gel OR Solution OR Cream OR Spray OR Foam OR Transdermic OR Transdermal OR Local OR Cutaneous OR Dermal OR Transcutaneous OR Percutaneous OR Skin OR Massage OR Embrocation OR Ointment OR Aerosol OR Creme OR Lotion OR Mousse OR Liniment OR Rub OR Balm OR Salve OR Emulsion OR Oil OR Patch OR Plaster).ti,ab,kw.
14. 12 OR 13
15. 11 and 14
16. Randomized controlled trial.pt.
17. Controlled clinical trial.pt.

18. Controlled Clinical Trials as Topic/
19. (Random\* OR Trial OR Placebo OR Control OR Sham OR Saline OR Vehicle OR Group\* OR Blind OR Mask).ti,ab,kw.
20. 16 OR 17 OR 18 OR 19
21. 4 and 15 and 20
22. limit 21 to humans
23. limit 22 to english language

**Subject:** Topical NSAIDs in Osteoarthritis

**Database:** Cochrane Central Register of Controlled Trials, via Ovid (Ovid CENTRAL)

**Search Strategy:**

---

1. exp Osteoarthritis/
2. (degenerative adj (arthritis OR joint\*1 OR arthritides)).ti,ab,kw.
3. (osteoarthr\* OR arthros\* OR coxarthros\* OR gonarthros\* OR joint failure\*1 OR osteo-arthritis OR OA).ti,ab,kw.
4. 1 OR 2 OR 3
5. exp Anti-Inflammatory Agents, Non-Steroidal/
6. NSAID\*1.ti,ab,kw.
7. ((nonsteroidal OR "non steroidal" OR non-steroidal) adj2 ("anti inflammator\*" OR antiinflammator\* OR "anti-inflammator\*")).ti,ab,kw.
8. ((Cyclo-oxygenase OR Cyclooxygenase OR Cyclo oxygenase OR cox) adj2 inhibit\*).ti,ab,kw.
9. (Aceclofenac OR Acemetacin OR Alminoprofen OR Aminophenazone OR Aminopropylone OR Ampiroxicam OR "Amtolmetin Guacil" OR Azapropazone OR Bendazac OR Benoxaprofen OR Benzydamine OR Beta-aminopropionitrile OR Bromfenac OR Bufexamac OR Bumadizone OR "Butibufen Sodium" OR Carprofen OR Celecoxib OR Clofexamide OR Clofezone OR Clonixin OR Dexibuprofen OR Diclofenac OR Dipyron OR Eitenac OR Epirizole OR Etodolac OR Etofenamate OR Etoricoxib OR Felbinac OR Fenbufen OR Fenoprofen OR Fentiazac OR Fepradinol OR Feprazone OR Firocoxib OR Floctafenine OR "Flufenamic Acid" OR Flunixin OR Flurbiprofen OR Furprofen OR Glafenine OR Glucametacin OR Ibuprofen OR Ibuproxam OR Indometacin OR Isonixin OR Kebuzone OR Ketoprofen OR Ketorolac OR Lonazolac OR Lornoxicam OR Loxoprofen OR Lumiracoxib OR "Meclofenamic Acid" OR "Mefenamic Acid" OR Meloxicam OR Mofebutazone OR Mofezolac OR Morniflumate OR Nabumetone OR Naproxen OR Nepafenac OR "Niflumic Acid" OR Nimesulide OR Oxaprozin OR Oxyphenbutazone OR Parecoxib OR Phenazone OR Phenylbutazone OR Piketoprofen OR Piroxicam OR Pranoprofen OR Proglumetacin OR Propyphenazone OR Proquazone OR Ramifenazone OR Rofecoxib OR Sulindac OR Suprofen OR Suxibuzone OR Tenoxicam OR Tepoxalin OR Tetridamine OR "Tiaprofenic Acid" OR Tiaramide OR "Tolfenamic Acid" OR Tolmetin OR Valdecoxib OR Vedaprofen OR Zaltoprofen).ti,ab,kw.
10. (Voltaren OR Apazone OR Indomethacin OR Etofenamat OR biarison OR Eumotol OR Brufen OR Phenylprenazone OR Droxyaryl OR bindazac OR Benzidamine OR diclophenac OR dicrofenac OR floctafenin OR Fluriproben OR Glaphenine OR Glafenin OR glucometacin\*1 OR glucametacine OR kebuson OR Oxyphenylbutazone OR Diphenylbutazone OR Feldene OR propylphenazone).ti,ab,kw.
11. 5 OR 6 OR 7 OR 8 OR 9 OR 10
12. exp Administration, Topical/
13. (Topical OR Gel OR Solution OR Cream OR Spray OR Foam OR Transdermic OR Transdermal OR Local OR Cutaneous OR Dermal OR Transcutaneous OR Percutaneous OR Skin OR Massage OR Embrocation OR Ointment OR Aerosol OR Creme OR Lotion OR Mousse OR Liniment OR Rub OR Balm OR Salve OR Emulsion OR Oil OR Patch OR Plaster).ti,ab,kw.
14. 12 OR 13
15. 11 and 14
16. Randomized controlled trial.pt.
17. Controlled clinical trial.pt.
18. Controlled Clinical Trials as Topic/

19. (Random\* OR Trial OR Placebo OR Control OR Sham OR Saline OR Vehicle OR Group\* OR Blind OR Mask).ti,ab,kw.
20. 16 OR 17 OR 18 OR 19
21. 4 and 15 and 20
22. limit 21 english language

**Subject:** Topical NSAIDs in Osteoarthritis

**Database:** SCOPUS

**Search Strategy:**

---

(TITLE-ABS-KEY (osteoarthr\* OR arthrosis OR coxarthros\* OR gonarthros\* OR "joint failure\*" OR osteo-arthritis OR OA)

OR TITLE-ABS-KEY (degenerative W/0 (arthritis OR joint\* OR arthritides))

)

**AND**

(TITLE-ABS-KEY ("Anti-Inflammatory Agents, Non-Steroidal" OR nsaid\*) OR TITLE-ABS-KEY ((nonsteroidal OR "non-steroidal") W/2 (antiinflammator\* OR "anti-inflammator\*"))

OR TITLE-ABS-KEY ("Cyclo-oxygenase" OR cyclooxygenase OR cox) W/2 inhibit\*)

OR TITLE-ABS-KEY (aceclofenac OR acemetacin OR alminoprofen OR aminophenazone OR aminopropylone OR ampiroxicam OR {Amtolmetin Guacil} OR azapropazone OR bendazac OR benoxaprofen OR benzydamine OR {Beta-aminopropionitrile} OR bromfenac OR bufexamac OR bumadizone OR {Butibufen Sodium} OR carprofen OR celecoxib OR clofexamide OR clofezone OR clonixin OR dexibuprofen OR diclofenac OR dipyrone OR eltenac OR epirizole OR etodolac OR etofenamate OR etoricoxib OR felbinac OR fenbufen OR fenoprofen OR fentiazac OR fepradinol OR feprazone OR firocoxib OR floctafenine OR {Flufenamic Acid} OR flunixin OR flurbiprofen OR furprofen OR glafenine OR glucametacin OR ibuprofen OR ibuproxam OR indometacin OR isonixin OR kebusone OR ketoprofen OR ketorolac OR lonazolac OR lornoxicam OR loxoprofen OR lumiracoxib OR {Meclofenamic Acid} OR {Mefenamic Acid} OR meloxicam OR mofebutazone OR mofezolac OR morniflumate OR nabumetone OR naproxen OR nepafenac OR {Niflumic Acid} OR nimesulide OR oxaprozin OR oxyphenbutazone OR parecoxib OR phenazone OR phenylbutazone OR piketoprofen OR piroxicam OR pranoprofen OR proglumetacin OR propyphenazone OR proquazone OR ramifenazone OR rofecoxib OR sulindac OR suprofen OR suxibuzone OR tenoxicam OR tepoxalin OR tetridamine OR {Tiaprofenic Acid} OR tiaramide OR {Tolfenamic Acid} OR tolmetin OR valdecoxib OR vedaprofen OR zaltoprofen )

OR TITLE-ABS-KEY (voltaren OR apazone OR indomethacin OR etofenammat OR biarison OR eumotol OR brufen OR phenylprenazone OR droxaryl OR bindazac OR benzidamine OR diclophenac OR dicrofenac OR floctafenin OR fluriproben OR glaphenine OR glafenin OR glucometacin\* OR glucametacine OR kebuson OR oxyphenylbutazone OR diphenylbutazone OR feldene OR propylphenazone)

)

**AND**

(TITLE-ABS-KEY (topical OR gel OR solution OR cream OR spray OR foam OR transdermic OR transdermal OR local OR cutaneous OR dermal OR transcutaneous OR percutaneous OR skin OR massage OR embrocation OR ointment OR aerosol OR creme OR lotion OR mousse OR liniment OR rub OR balm OR salve OR emulsion OR oil OR patch OR plaster)

)

**AND**

(TITLE-ABS-KEY ("Randomized controlled trial" OR "Controlled clinical trial\*" OR Random\* OR Trial OR Placebo OR Control OR Sham OR Saline OR Vehicle OR Group\* OR Blind OR Mask)

)

**AND** TITLE-ABS-KEY (human)

**AND** (LIMIT-TO (DOCTYPE,"ar ") OR LIMIT-TO (DOCTYPE," ip "))

**AND** (LIMIT-TO (LANGUAGE,"English "))
