# Supplementary material for: Safety of Topical Non-steroidal Anti-Inflammatory Drugs in Osteoarthritis: Outcomes of a Systematic Review and Meta-Analysis
Source: PubMed Central journal article supplement — Drugs Aging. 2019 May 9;36(Suppl 1):45–64. doi: 10.1007/s40266-019-00661-0 (PMC6509095; doi:10.1007/s40266-019-00661-0), 2019-05-09
Supplement: 40266_2019_661_MOESM3_ESM.pdf [file 40266_2019_661_MOESM3_ESM.pdf]

**Supplement: Safety of Anti-Osteoarthritis Medications**

**Safety of topical non-steroidal anti-inflammatory drugs in osteoarthritis: Outcomes of a systematic review and meta-analysis**

Germain Honvo, Victoria Leclercq, Anton Geerinck, Thierry Thomas, Nicola Veronese, Alexia Charles, Véronique Rabenda, Charlotte Beaudart, Cyrus Cooper, Jean-Yves Reginster, Olivier Bruyère

**ELECTRONIC SUPPLEMENTARY MATERIAL 3**

**1. Assessment of publication bias by safety outcome in studies on topical non-steroidal anti-inflammatory drugs (NSAIDs) (overall)**

**Figure 38:** Funnel plot using data for skin and subcutaneous tissue disorders with all topical NSAIDs versus placebo in patients with osteoarthritis (OA).

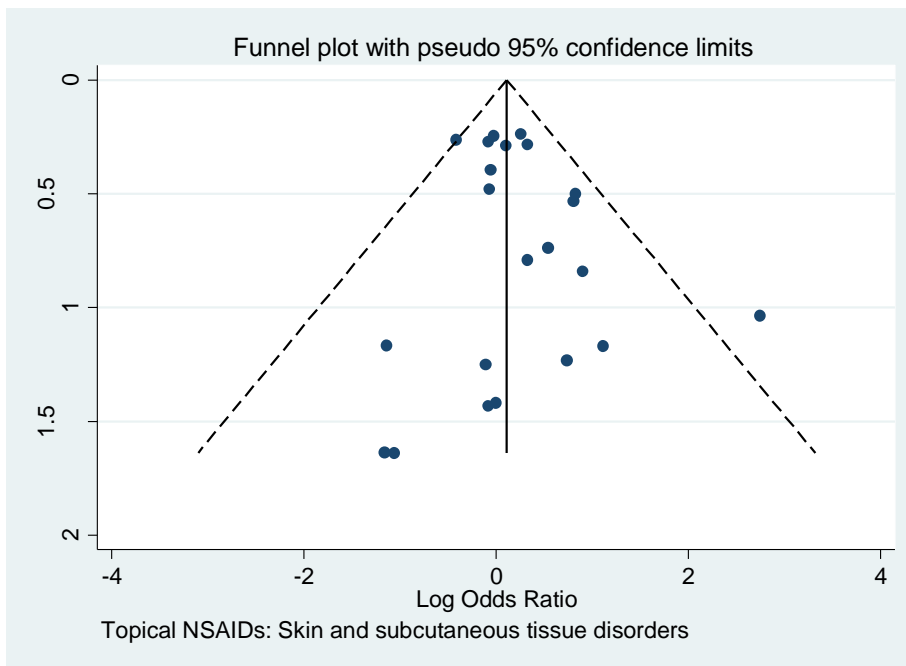

Harbord's test:  $p = 0.663$

**Figure 39:** Funnel plot using data for gastrointestinal disorders with all topical NSAIDs versus placebo in patients with OA.

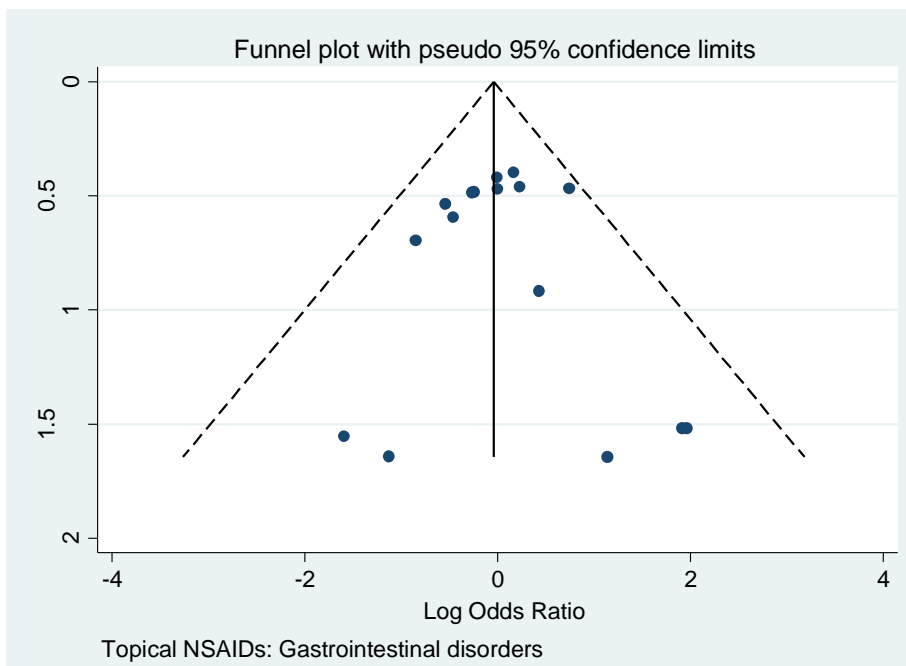

Harbord's test:  $p = 0.802$

**Figure 40:** Funnel plot using data for cardiac disorders with all topical NSAIDs versus placebo in patients with OA.

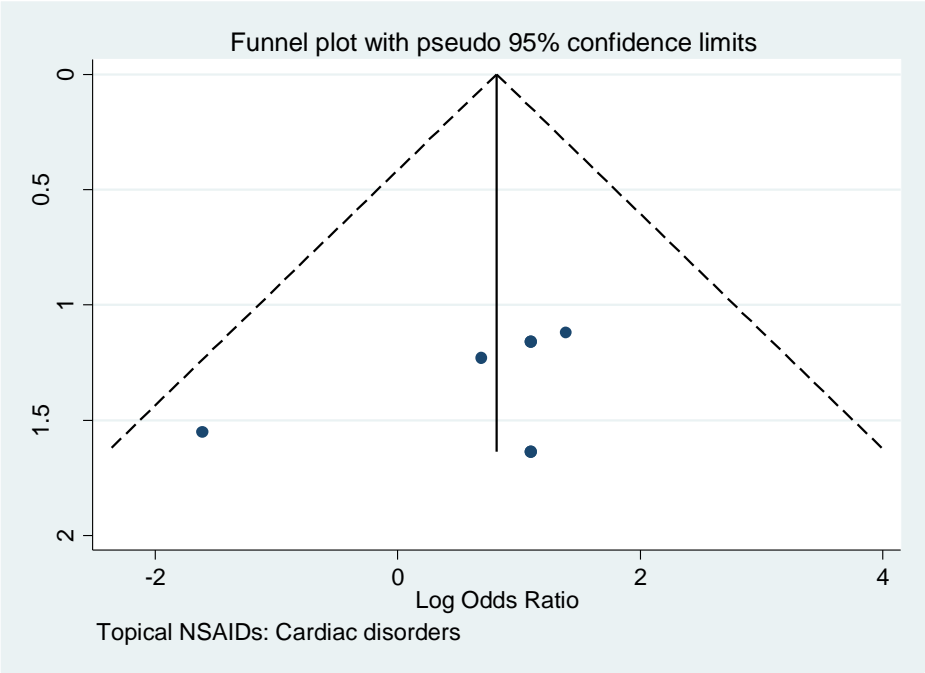

**Figure 41:** Funnel plot using data for vascular disorders with all topical NSAIDs versus placebo in patients with OA.

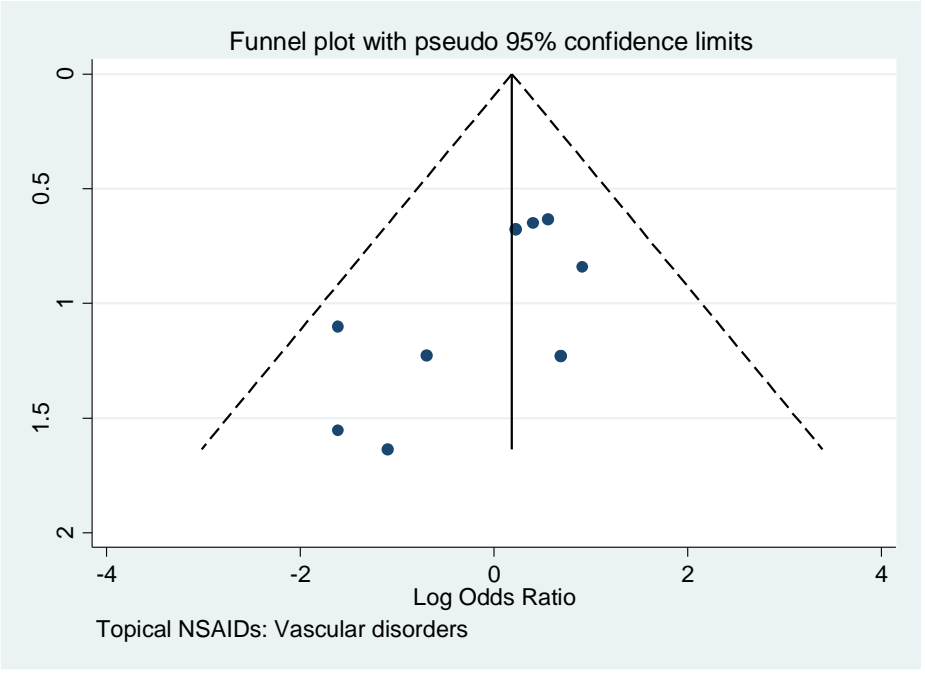

**Figure 42:** Funnel plot using data for nervous system disorders with all topical NSAIDs versus placebo in patients with OA.

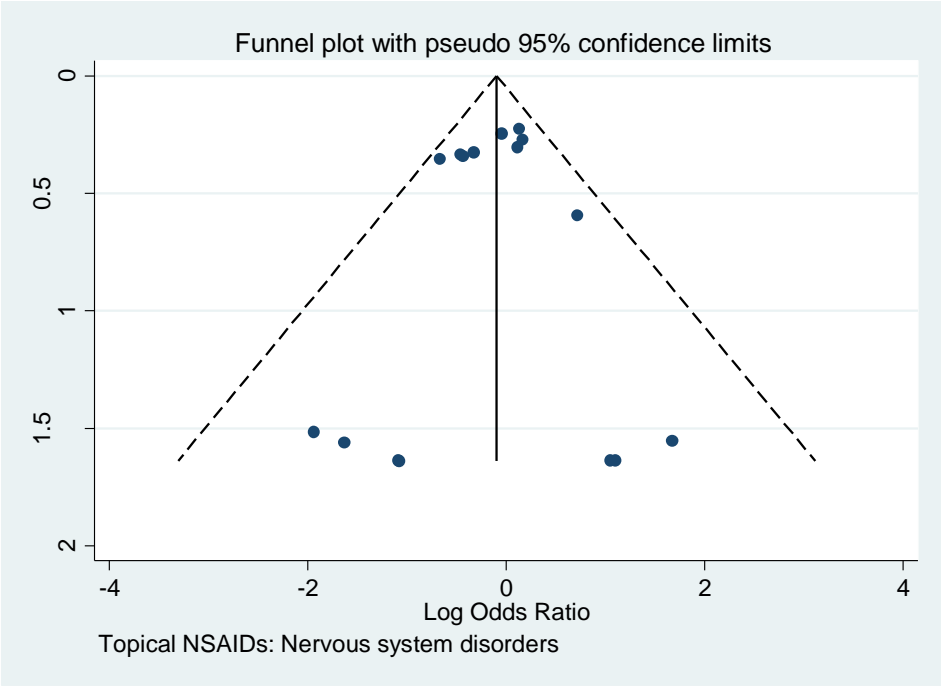

Harbord's test: P = 0.652

**Figure 43:** Funnel plot using data for musculoskeletal and connective tissue disorders with all topical NSAIDs versus placebo in patients with OA.

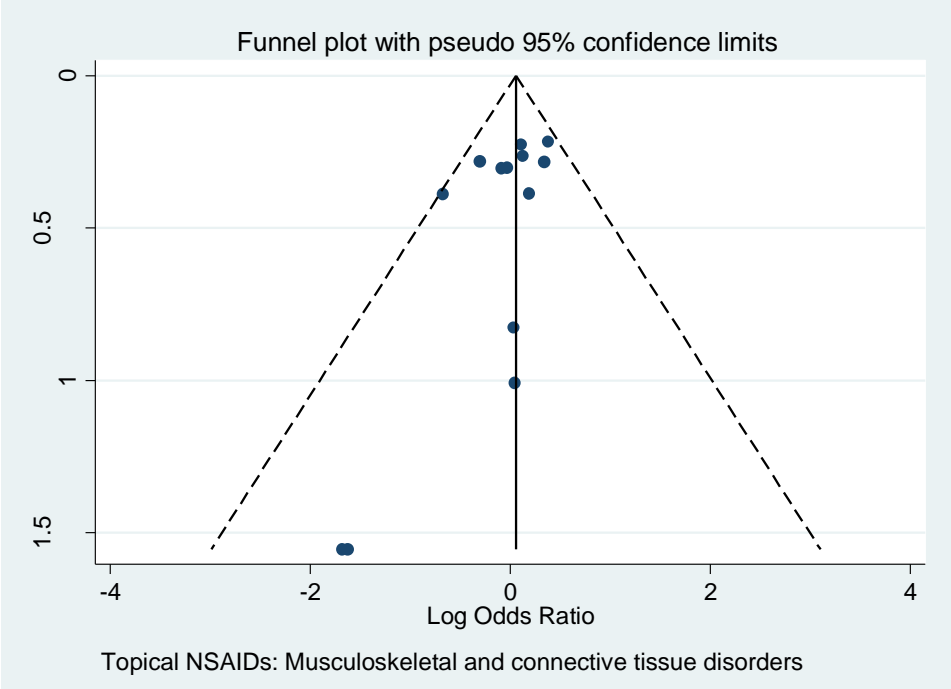

Harbord's test: P = 0.038

**Figure 44:** Funnel plot using data for severe adverse events with all topical NSAIDs versus placebo in patients with OA.

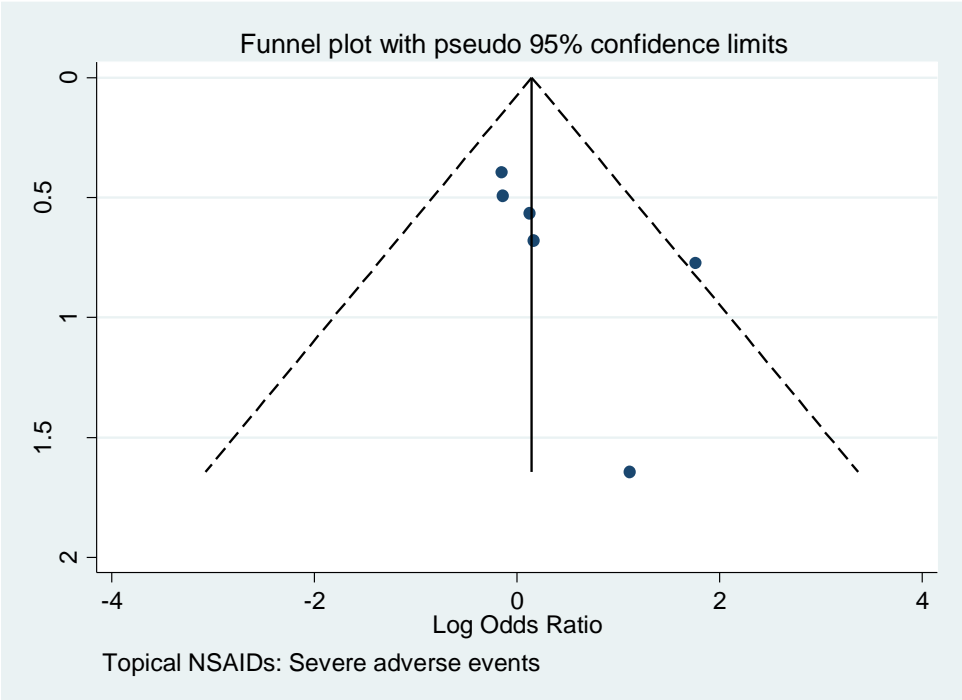

**Figure 45:** Funnel plot using data for serious adverse events with all topical NSAIDs versus placebo in patients with OA.

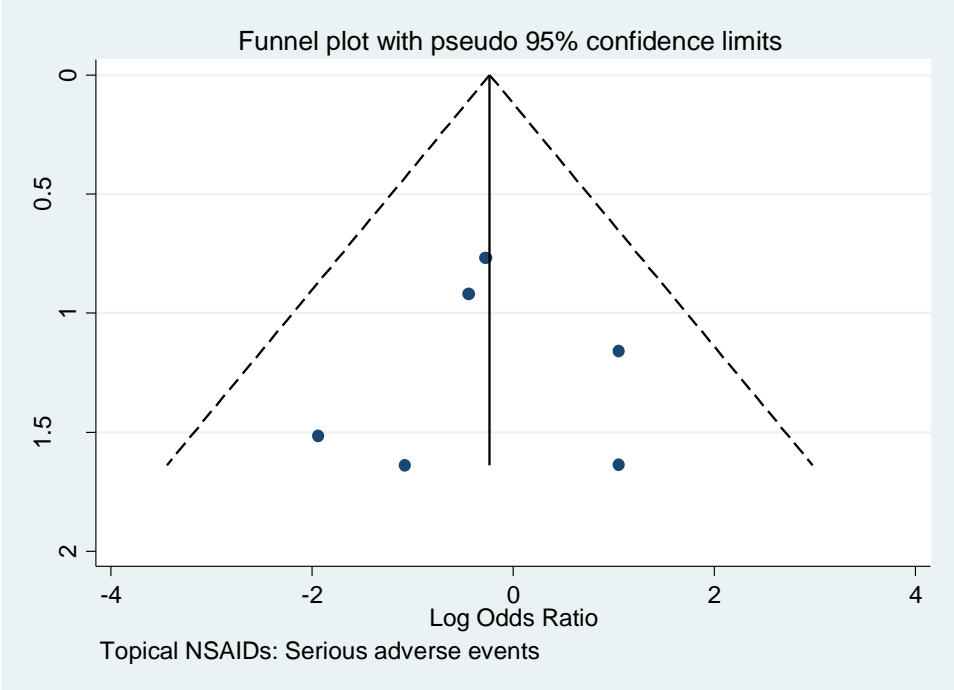

**Figure 46:** Funnel plot using data for dropouts due to adverse events with all topical NSAIDs versus placebo in patients with OA.

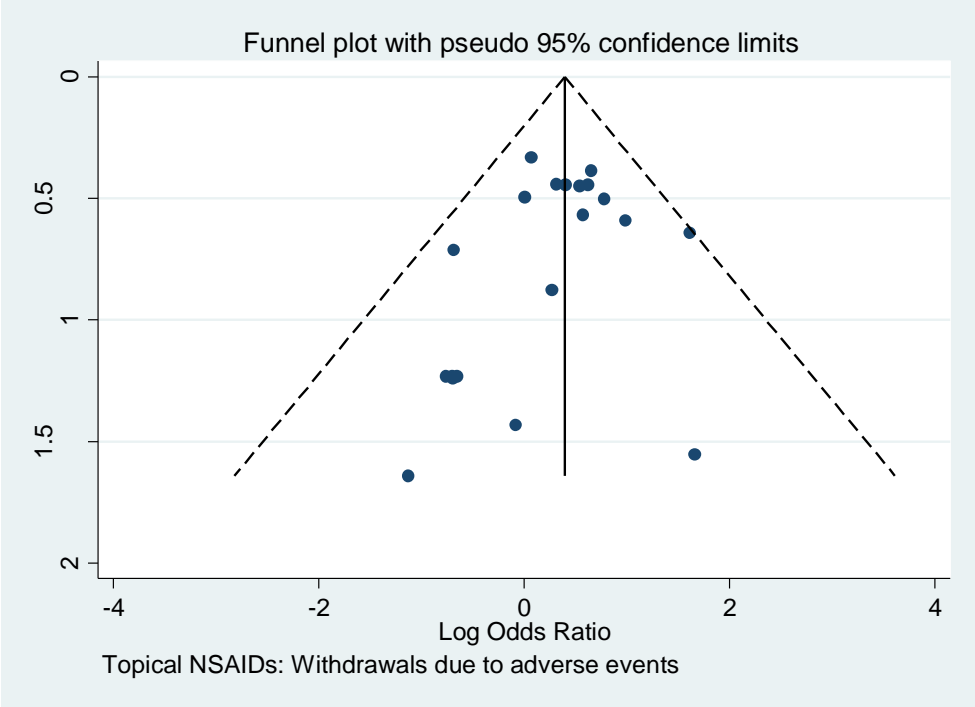

Harbord's test: P = 0.111

## 2. Assessment of publication bias by safety outcome in studies on topical diclofenac

**Figure 47:** Funnel plot using data for skin and subcutaneous tissue disorders with topical diclofenac versus placebo in patients with OA.

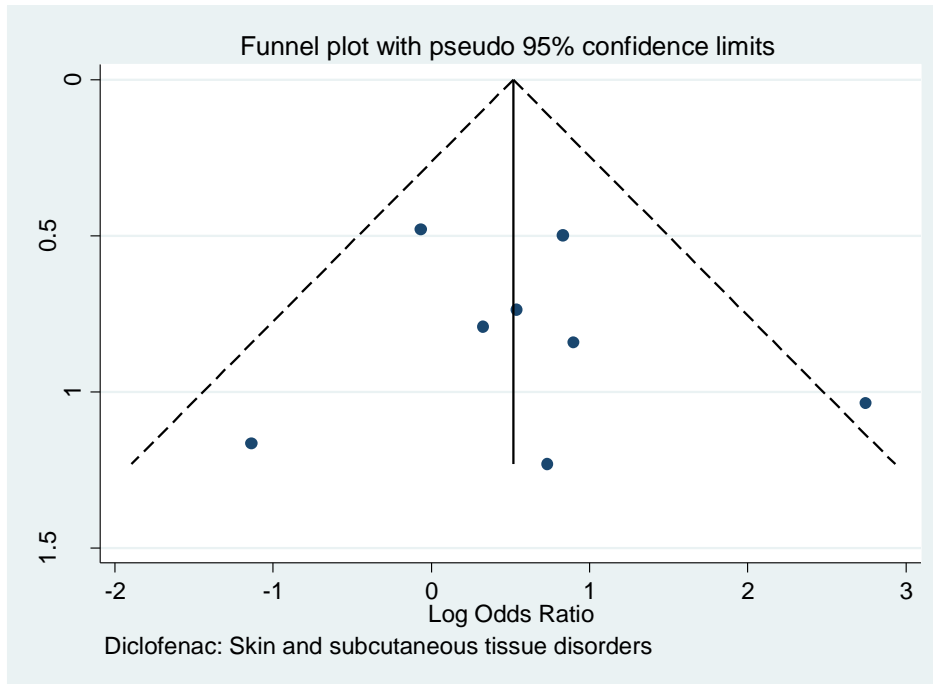

**Figure 48:** Funnel plot using data for gastrointestinal disorders with topical diclofenac versus placebo in patients with OA.

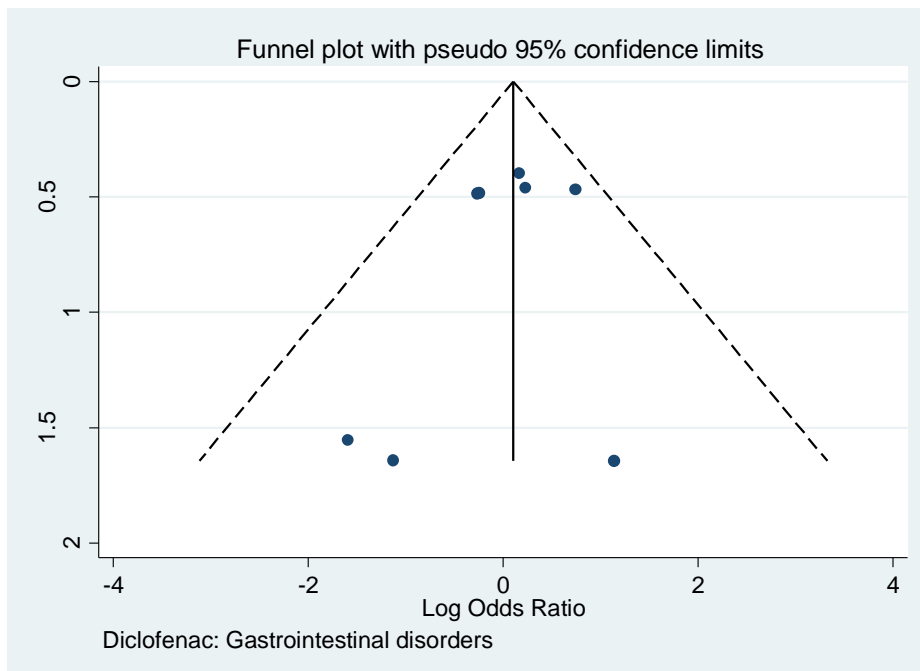

**Figure 49:** Funnel plot using data for cardiac disorders with topical diclofenac versus placebo in patients with OA.

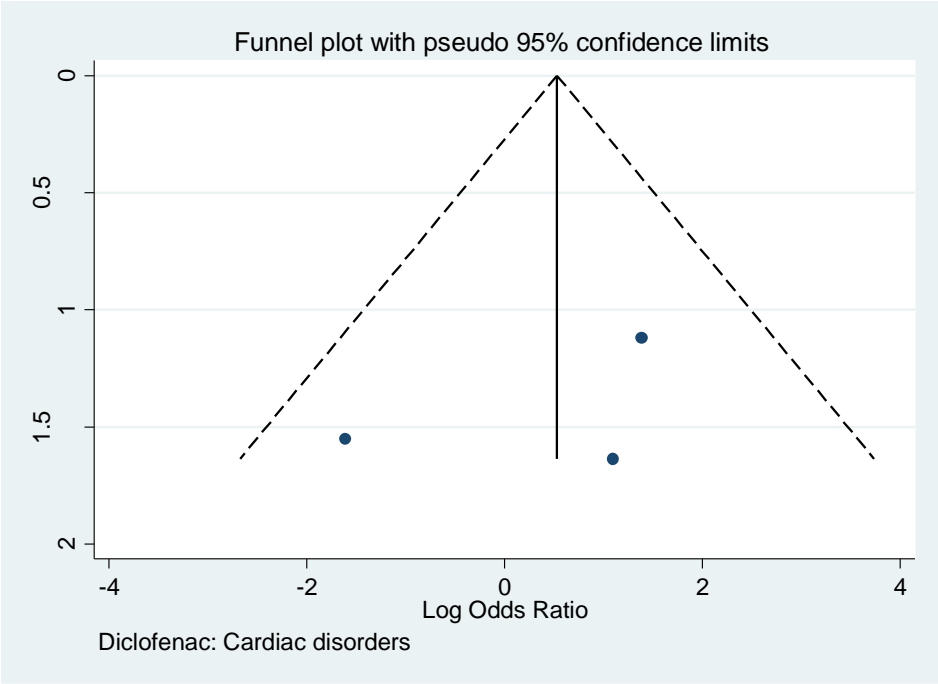

**Figure 50:** Funnel plot using data for vascular disorders with topical diclofenac versus placebo in patients with OA.

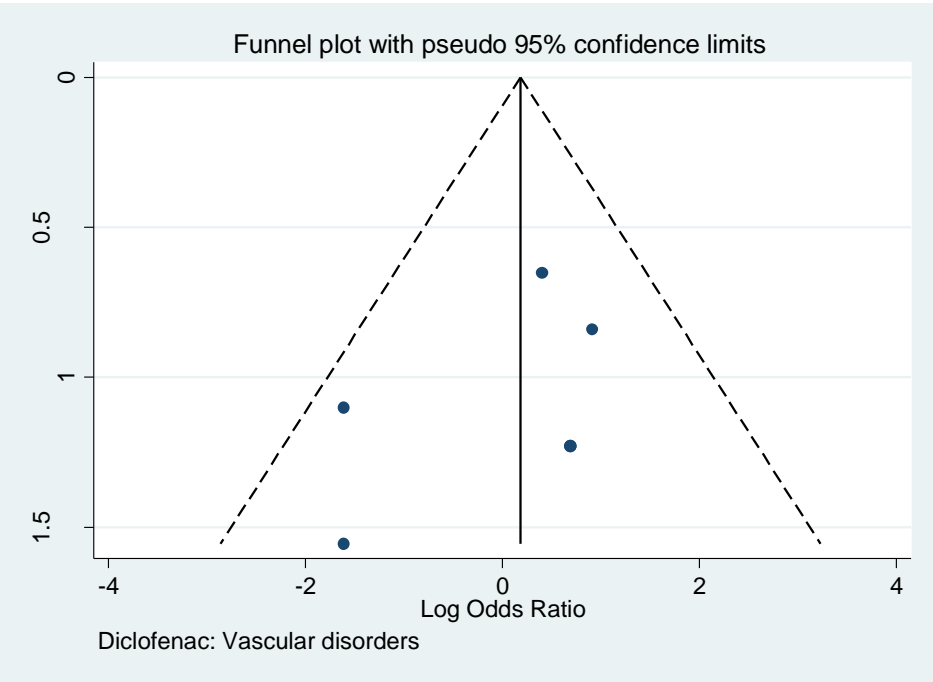



**Figure 51:** Funnel plot using data for nervous system disorders with topical diclofenac versus placebo in patients with OA.

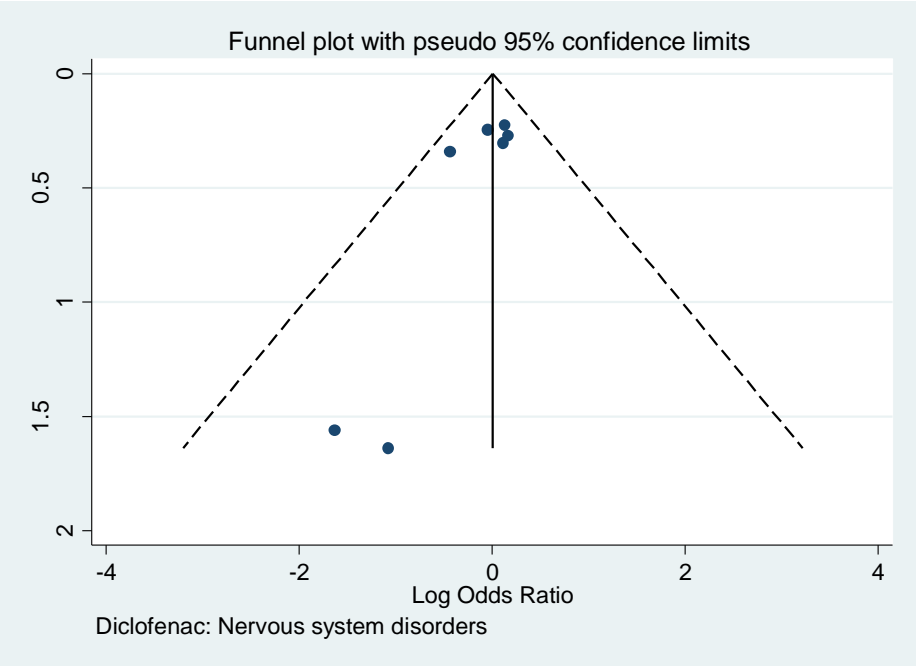

**Figure 52:** Funnel plot using data for musculoskeletal and connective tissue disorders with topical diclofenac versus placebo in patients with OA.

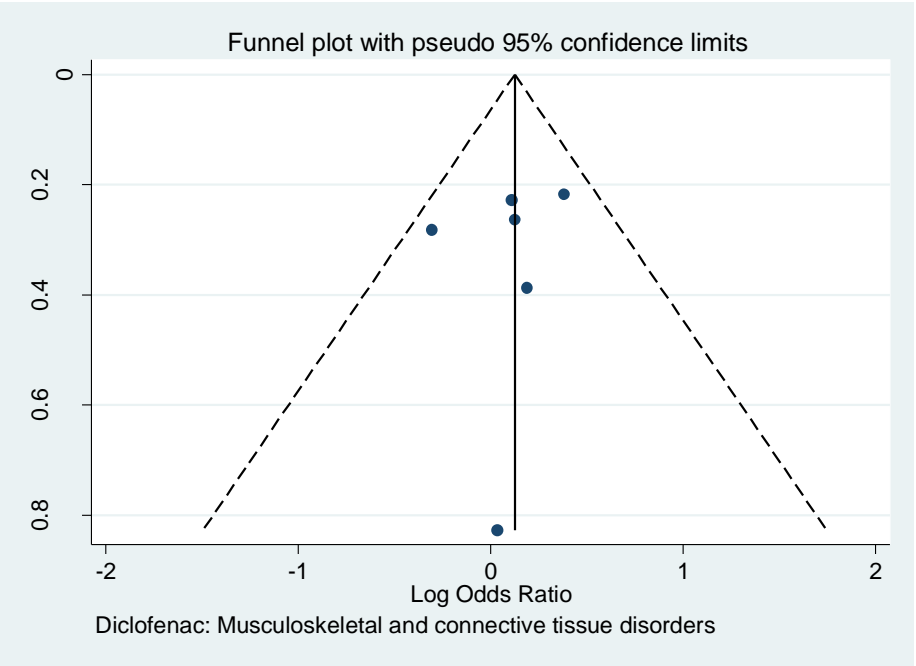

**Figure 53:** Funnel plot using data for severe adverse events with topical diclofenac versus placebo in patients with OA.

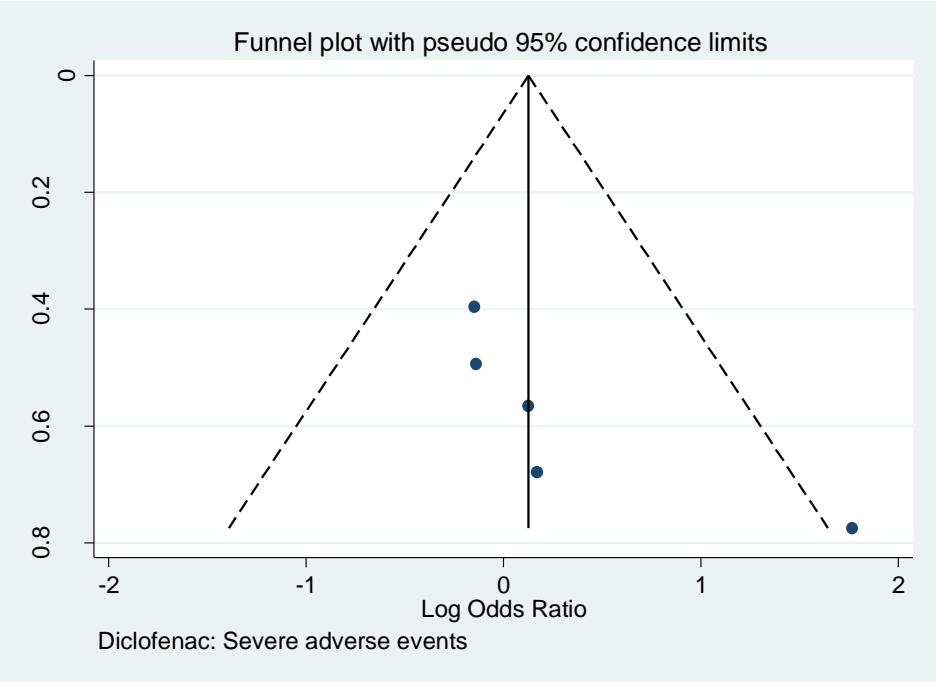

**Figure 54:** Funnel plot using data for serious adverse events with topical diclofenac versus placebo in patients with OA.

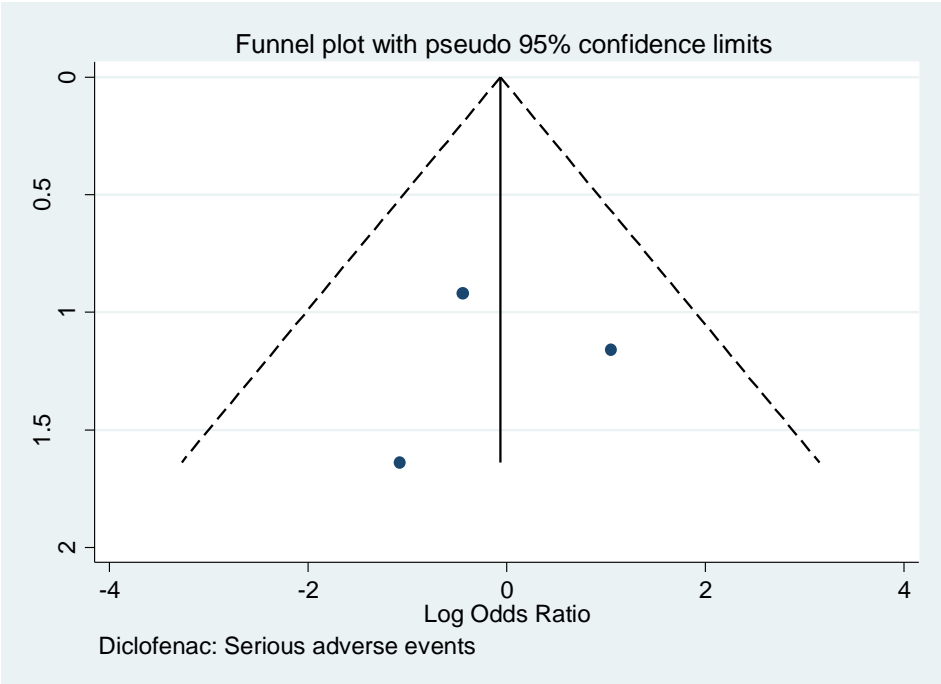

**Figure 55:** Funnel plot using data for dropouts due to adverse events with topical diclofenac versus placebo in patients with OA.

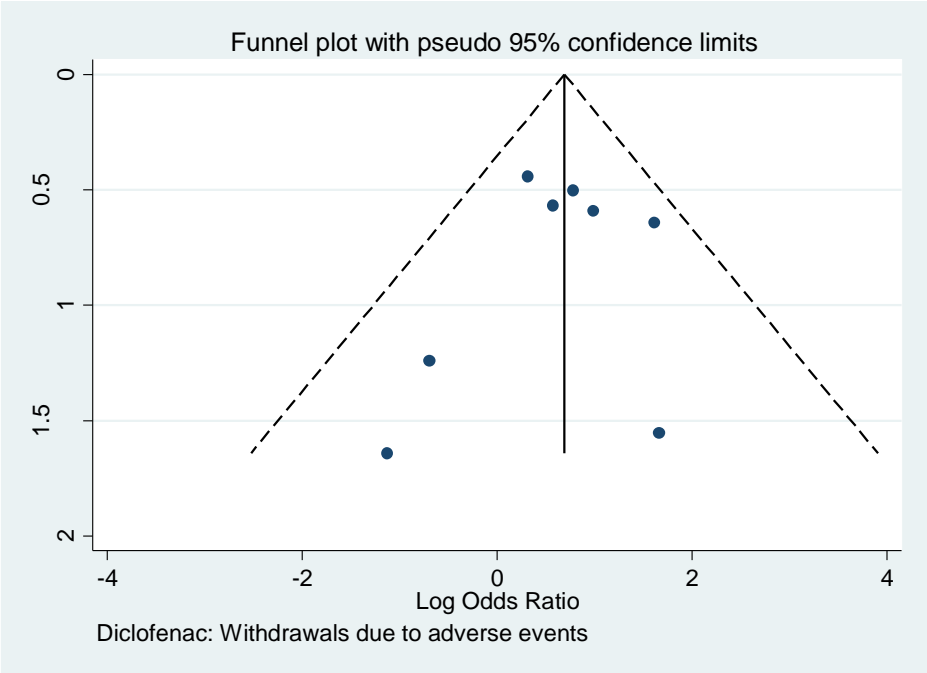

### 3. Assessment of publication bias by safety outcome in studies on topical ketoprofen

**Figure 56:** Funnel plot using data for skin and subcutaneous tissue disorders with topical ketoprofen versus placebo in patients with OA.

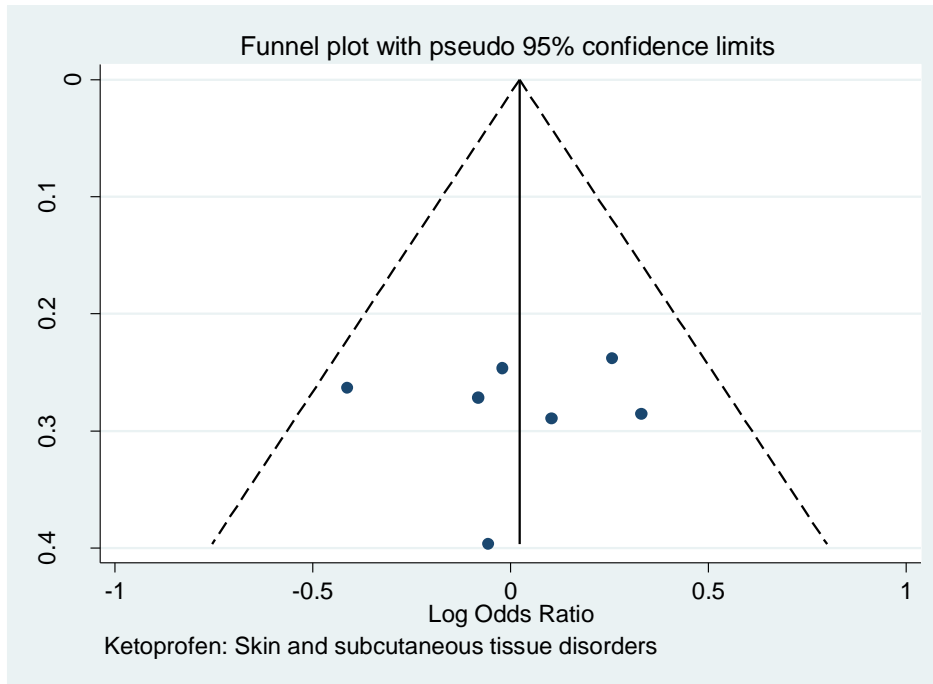

**Figure 57:** Funnel plot using data for gastrointestinal disorders with topical ketoprofen versus placebo in patients with OA.

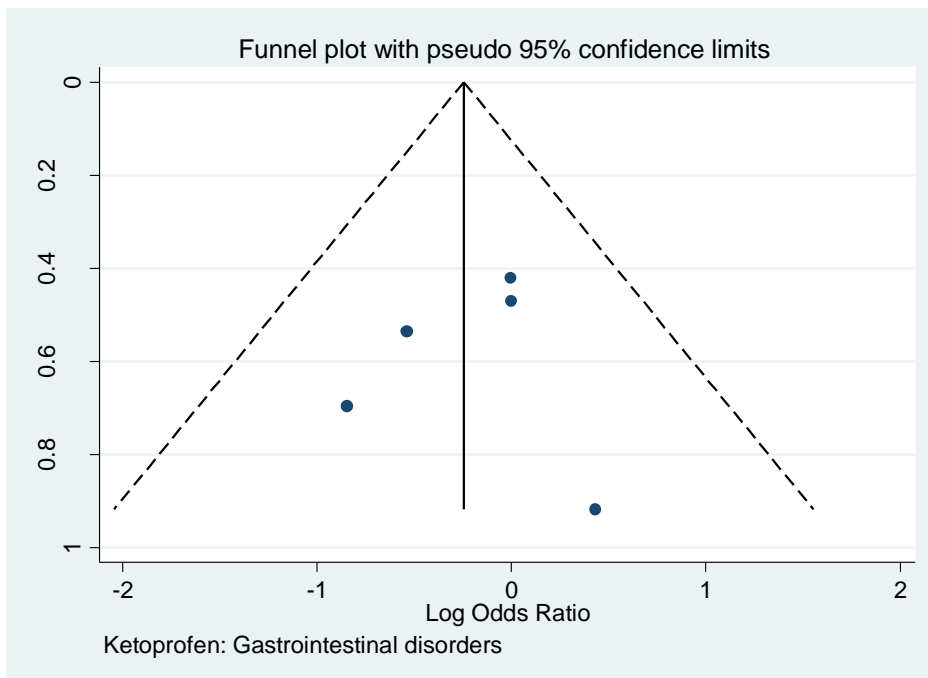

**Figure 58:** Funnel plot using data for cardiac disorders with topical ketoprofen versus placebo in patients with OA.

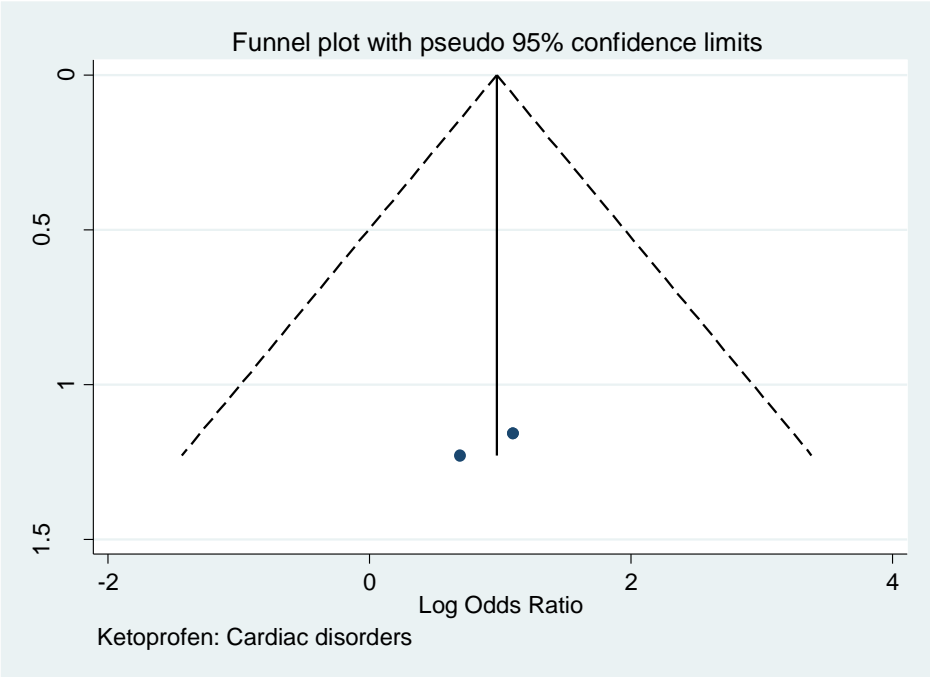

**Figure 59:** Funnel plot using data for vascular disorders with topical ketoprofen versus placebo in patients with OA.

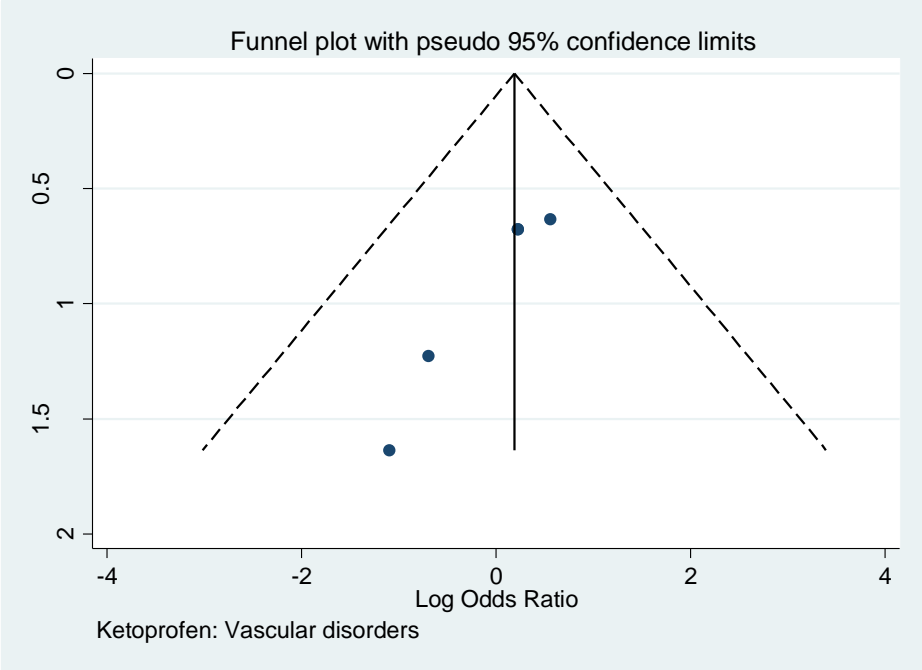

**Figure 60:** Funnel plot using data for nervous system disorders with topical ketoprofen versus placebo in patients with OA.

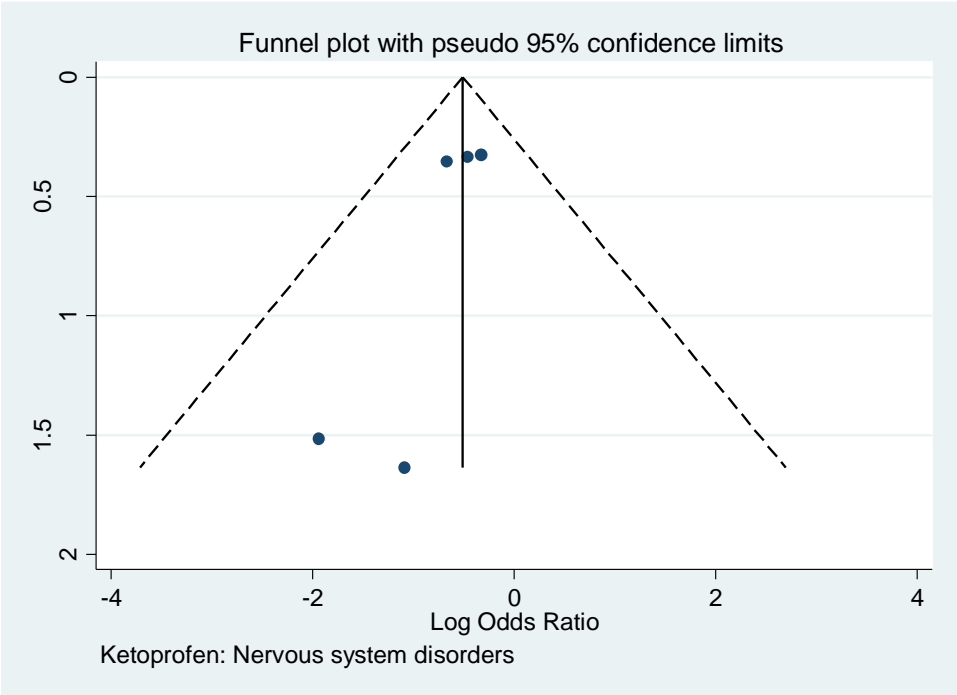

**Figure 61:** Funnel plot using data for musculoskeletal and connective tissue disorders with topical ketoprofen versus placebo in patients with OA.

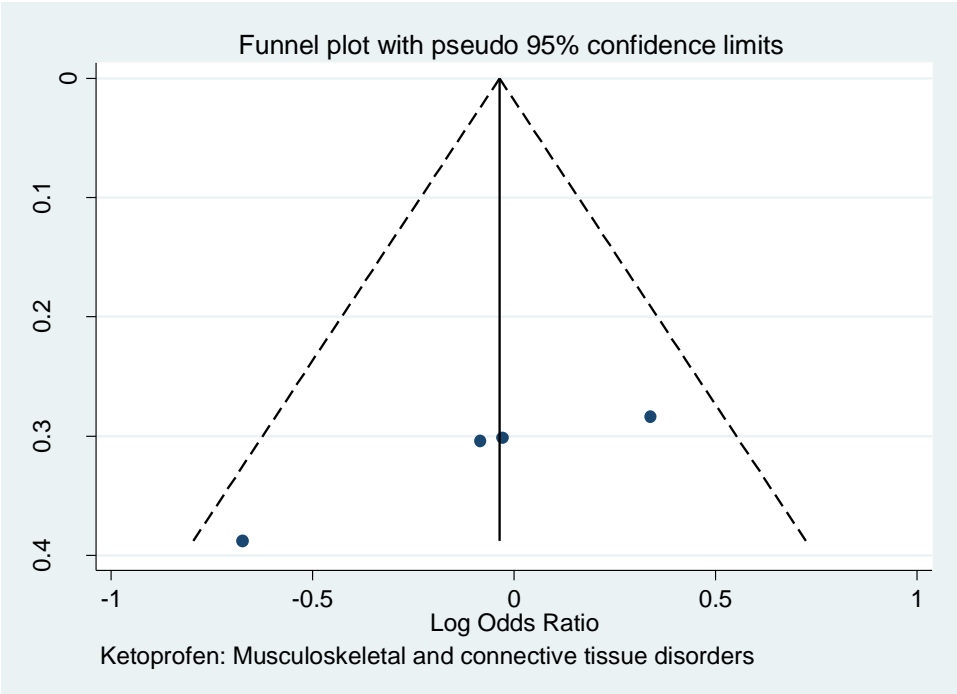

**Severe adverse events with topical ketoprofen:** All studies were with null events; thus, the analysis for publication bias was not possible.

**Figure 62:** Funnel plot using data for serious adverse events with topical ketoprofen versus placebo in patients with OA.

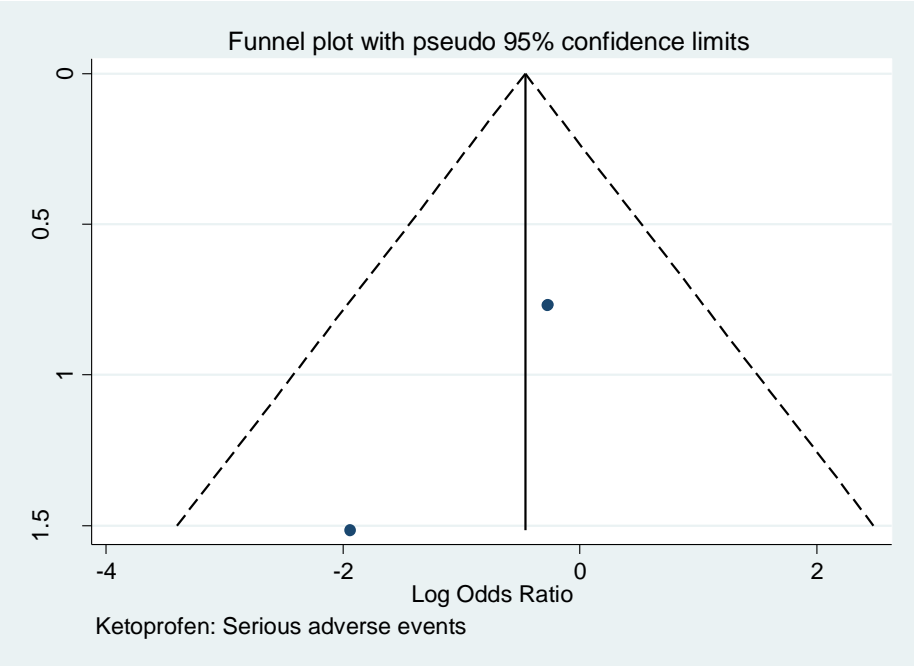

**Figure 63:** Funnel plot using data for dropouts due to adverse events with topical ketoprofen versus placebo in patients with OA.

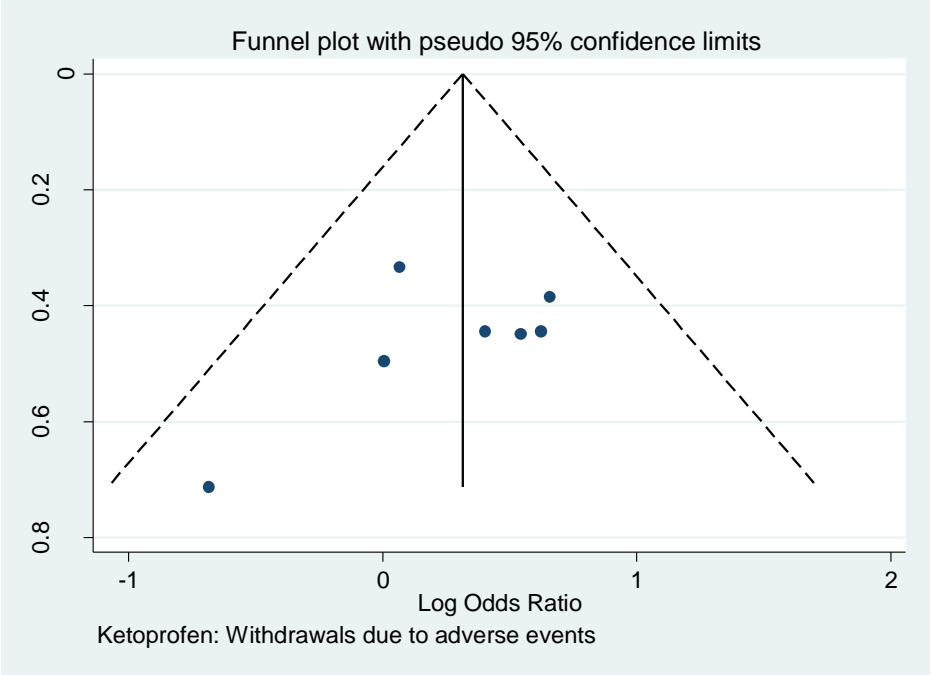

#### **4. Assessment of publication bias by safety outcome in studies on topical Ibuprofen**

Only 3 studies were available for this meta-analysis, with several null events; thus, analyses for publication bias were not possible.
